# Supplementary material for: Respiratory dysrhythmia in dementia with Lewy bodies: a cross-sectional study
Source: PubMed Central journal article supplement — BMJ Open. 2013 Sep 7;3(9):e002870. doi: 10.1136/bmjopen-2013-002870 (PMC3773650; doi:10.1136/bmjopen-2013-002870), 2013-09-07
Supplement: bmjopen-2013-002870.draft_revisions.pdf [file bmjopen-2013-002870.draft_revisions.pdf]

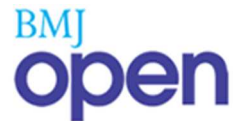

**Respiratory dysrhythmia in Dementia with Lewy bodies: a cross-sectional study**

|                                 |                                                                                                                                                                                                                                                                                                                                                                                                                                                                                                                                                                                                                                               |
|---------------------------------|-----------------------------------------------------------------------------------------------------------------------------------------------------------------------------------------------------------------------------------------------------------------------------------------------------------------------------------------------------------------------------------------------------------------------------------------------------------------------------------------------------------------------------------------------------------------------------------------------------------------------------------------------|
| Journal:                        | <i>BMJ Open</i>                                                                                                                                                                                                                                                                                                                                                                                                                                                                                                                                                                                                                               |
| Manuscript ID:                  | bmjopen-2013-002870                                                                                                                                                                                                                                                                                                                                                                                                                                                                                                                                                                                                                           |
| Article Type:                   | Research                                                                                                                                                                                                                                                                                                                                                                                                                                                                                                                                                                                                                                      |
| Date Submitted by the Author:   | 12-Mar-2013                                                                                                                                                                                                                                                                                                                                                                                                                                                                                                                                                                                                                                   |
| Complete List of Authors:       | Hibi, Shinichiro; The University of Tokyo, Department of Geriatric Medicine<br>Yamaguchi, Yasuhiro; The University of Tokyo, Department of Geriatric Medicine<br>Umeda-Kameyama, Yumi; The University of Tokyo, Department of Geriatric Medicine<br>Iijima, Katsuya; The University of Tokyo, Department of Geriatric Medicine<br>Takahashi, Miwako; The University of Tokyo, Department of Radiology<br>Momose, Toshimitsu; The University of Tokyo, Department of Radiology<br>Akishita, Masahiro; The University of Tokyo, Department of Geriatric Medicine<br>Ouchi, Yasuyoshi; The University of Tokyo, Department of Geriatric Medicine |
| <b>Primary Subject Heading</b>: | Neurology                                                                                                                                                                                                                                                                                                                                                                                                                                                                                                                                                                                                                                     |
| Secondary Subject Heading:      | Respiratory medicine                                                                                                                                                                                                                                                                                                                                                                                                                                                                                                                                                                                                                          |
| Keywords:                       | Dementia < NEUROLOGY, RESPIRATORY MEDICINE (see Thoracic Medicine), SLEEP MEDICINE                                                                                                                                                                                                                                                                                                                                                                                                                                                                                                                                                            |
|                                 |                                                                                                                                                                                                                                                                                                                                                                                                                                                                                                                                                                                                                                               |

SCHOLARONE™  
Manuscripts

1  
2  
3  
4  
5  
6 **Respiratory dysrhythmia in Dementia with Lewy bodies: a cross-sectional study**  
7  
8  
9

10  
11 Shinichiro Hibi<sup>1</sup>, Yasuhiro Yamaguchi<sup>1\*</sup>, Yumi Umeda-Kameyama<sup>1</sup>, Katsuya Iijima<sup>1</sup>, Miwako

12  
13  
14 Takahashi<sup>2</sup>, Toshimitsu Momose<sup>2</sup>, Masahiro Akishita<sup>1</sup>, Yasuyoshi Ouchi<sup>1</sup>  
15  
16  
17

18  
19  
20 <sup>1</sup>Department of Geriatric Medicine, Graduate School of Medicine, The University of Tokyo,  
21

22  
23 <sup>2</sup>Department of Radiology, Graduate School of Medicine, The University of Tokyo,  
24  
25  
26

27  
28  
29 \*Corresponding to Yasuhiro Yamaguchi  
30

31  
32 Department of Geriatric Medicine, Graduate School of Medicine, The University of Tokyo,  
33

34  
35 7-3-1 Hongo, Bunkyo-ku, Tokyo, 113-0033, Japan  
36

37  
38 TEL 81-3-5800-8652  
39

40  
41 FAX 81-3-5800-6530  
42  
43  
44  
45

46  
47 Key words: ataxic breathing, dementia with Lewy bodies, Alzheimer's disease,  
48

49  
50 polysomnographic recordings, Fast Fourier Transform  
51  
52  
53  
54

55  
56 Word count: 2590 words  
57  
58  
59  
60

1  
2  
3  
4  
5  
6 Article Focus  
7  
8

9 In this study, we first indicated the presence of dysrhythmic breathing in the patients with  
10  
11 Dementia with Lewy bodies, compared to the patients with Alzheimer's disease and the  
12  
13 patients without dementia.  
14  
15  
16  
17  
18  
19

20 Key messages  
21  
22

23 The dysrhythmia of the breath-to-breath time on bed rest with closed eyes is significantly  
24  
25 higher in the patients with Dementia with Lewy bodies.  
26  
27  
28  
29  
30  
31

32 The recording of the breath-to-breath time on bed rest with closed eyes can be a useful  
33  
34 marker for the diagnosis of Dementia with Lewy bodies.  
35  
36  
37  
38  
39  
40

41 Strengths and Limitations  
42  
43

44 Dysrhythmic breathing is a completely novel topic in Dementia with Lewy bodies.  
45  
46  
47  
48

49 This study is a cross-sectional, small-sized pilot study.  
50  
51  
52  
53  
54

55 The pathological diagnosis of Dementia with Lewy bodies could not be obtained.  
56  
57  
58  
59  
60

**ABSTRACT**

**Objectives:** Dementia with Lewy bodies (DLB) is the second most common form of neurodegenerative dementia after Alzheimer's disease (AD). DLB is characterized by intracytoplasmic inclusions called Lewy bodies that are often seen in the brainstem. Because modulation of the respiratory rhythm is one of the most important functions of the brainstem, DLB patients may exhibit dysrhythmic breathing. This hypothesis has not yet been systematically studied. Therefore, we evaluated the association between DLB and dysrhythmic breathing.

**Design:** This was a cross-sectional study where consecutive inpatients who were admitted for the evaluation of progressive cognitive impairment were enrolled. We assessed breathing irregularity using polysomnographic recordings on bed rest with closed eyes, without reference to the clinical differentiation among DLB, AD and having no dementia.

**Setting:** Single center in Japan.

**Participants:** Fourteen DLB patients, twenty-one AD patients and twelve non-demented patients were enrolled in this study.

**Primary outcome measures:** The coefficient of variation (CV) of the breath-to-breath time was calculated. We also examined the amplitude spectrum  $A(f)$  obtained using the Fast Fourier Transform and Shannon Entropy  $S$  of  $A(f)$  in DLB patients compared to AD patients

1  
2  
3  
4  
5  
6 and non-demented patients.  
7

8  
9 **Results:** The values of CV and Entropy S were significantly higher in the DLB patients than  
10  
11 in the AD and non-demented patients. No significant differences were found between the AD  
12  
13 patients and the non-demented patients.  
14  
15

16  
17  
18 **Conclusions:** DLB patients exhibit dysrhythmic breathing compared to AD and  
19  
20 non-demented patients. Dysrhythmic breathing is a new clinical feature of DLB and the  
21  
22 spectral analysis of breathing patterns can be clinically useful for the diagnostic  
23  
24 differentiation of DLB from AD.  
25  
26  
27  
28  
29  
30  
31  
32  
33  
34  
35  
36  
37  
38  
39  
40  
41  
42  
43  
44  
45  
46  
47  
48  
49  
50  
51  
52  
53  
54  
55  
56  
57  
58  
59  
60

## 1. INTRODUCTION

Dementia with Lewy bodies (DLB) is a neurodegenerative disease characterized by parkinsonism, visual hallucinations and cognitive fluctuations. DLB is now thought to be the second most common form of dementia after Alzheimer's disease (AD), affecting 15-25% of elderly demented patients[1]. The clinical diagnostic criteria for DLB were first published in 1996 and modified in 2005[1,2]. The central feature of DLB is progressive cognitive decline. The core features include recurrent visual hallucinations, spontaneous features of parkinsonism and fluctuating cognition with pronounced variations in attention and alertness. These diagnostic criteria require clinical evaluation by a trained neurologist and include few objective markers. Although Single Photon Emission Computed Tomography (SPECT) and <sup>123</sup>I-metaiodobenzylguanidine (MIBG) myocardial scintigraphy are useful for making the differential diagnosis of DLB[3-5], these examinations are too expensive to be generally utilized. DLB is characterized by intracytoplasmic inclusions called Lewy bodies that consist of filamentous protein granules composed of alpha-synuclein and ubiquitin. Lewy bodies are often seen in the brainstem and in limbic and cortical neurons[2]. On the other hand, the brainstem serves as the connection among the cerebral hemispheres and the cerebellum, and is responsible for basic vital functions. Modulation of the respiratory rhythm is one of the most important functions of the brainstem. In cases of brain disorders, such as Wallenberg

1  
2  
3  
4  
5  
6 syndrome and brain tumors, it is known that respiratory patterns sometimes become ataxic.

7  
8  
9 Because brainstem neurodegeneration is often seen in patients with DLB, the respiratory  
10  
11 patterns of DLB patients might be dysrhythmic. However, this hypothesis has not yet been  
12  
13 systematically studied and no controlled data have been published to date. The present  
14  
15 investigation was performed in patients with DLB, patients with AD and non-demented  
16  
17 patients to assess and compare breathing patterns. In addition, we evaluated the usefulness  
18  
19 of the measurement of breathing patterns as a novel tool to aid the differential diagnosis of  
20  
21 dementia.  
22  
23  
24  
25  
26  
27  
28  
29  
30  
31

## 32 **2. METHODS**

### 33 **2.1. Subjects**

34  
35  
36 The study population comprised consecutive inpatients of the Department of Geriatric  
37  
38 Medicine at the University of Tokyo Hospital, who were admitted for the evaluation of  
39  
40 progressive cognitive impairment. The patients underwent neuropsychological assessments,  
41  
42 including the Mini-Mental State Examination (MMSE), blood tests, and neuroimaging tests  
43  
44 (Magnetic Resonance Imaging (MRI) and SPECT). The diagnosis was made at a  
45  
46 consensus conference of physicians and neurologists. The diagnosis of DLB was based on  
47  
48 the clinical diagnostic criteria proposed by McKeith et al in 2005[2]. And AD was diagnosed  
49  
50  
51  
52  
53  
54  
55  
56  
57  
58  
59  
60

1  
2  
3  
4  
5  
6 in accordance with the National Institute of Neurological and Communicative Disorders and  
7  
8  
9 Stroke and the Alzheimer's disease and Related Disorders Association (NINCDS-ADRDA)  
10  
11 [6]. The non-demented group comprised the patients who did not fit the criteria for dementia  
12  
13 in the medical and neurological examinations. Between November 2010 and June 2012, 70  
14  
15 patients were enrolled in this study.  
16  
17  
18

19  
20 The study was approved by the institutional review board of the Graduate School of  
21  
22 Medicine, University of Tokyo, and written informed consent was obtained from all  
23  
24 participants before the study.  
25  
26  
27

## 28 29 **2.2. Exclusion Criteria**

30  
31 We evaluated the breathing patterns of DLB patients, AD patients and non-demented  
32  
33 patients. Patients with cognitive impairments other than AD or DLB (e.g. normal pressure  
34  
35 hydrocephalus, vascular dementia) were excluded.  
36  
37  
38

39  
40 Breathing irregularities are associated with certain environments such as high altitudes,  
41  
42 medical conditions such as heart failure and chronic obstructive pulmonary disease, and the  
43  
44 usage of opioids or levodopa[7,8]. We excluded one patient who reported breathing  
45  
46 problems, including dyspnea. We also excluded four patients who were taking levodopa and  
47  
48 dopamine-agonists. No patients were using opioids. We excluded three patients whose  
49  
50 recorded respiratory signal data were insufficient due to noise.  
51  
52  
53  
54  
55  
56  
57  
58  
59  
60



### 2.3. Recordings of respiration

The patients underwent thirty minutes or more of recordings of respiration on bed rest with closed eyes in the inpatient ward by using the device for polysomnography (Somnotrac Pro, CareFusion, San Diego, CA, USA). The recordings included two electroencephalogram (EEG) leads (C3-A2 and O2-A1), electrooculogram and submental electromyogram (EMG). Oronasal thermistor channel and arterial oxygen saturation (finger oximetry) were also monitored. All recordings were scored visually by an experienced rater according to the standard criteria[9].

Five consecutive minutes of stable respiratory signals measured while the patients were awake were extracted from the recordings. Stable respiratory signals during wakefulness were identified using the respiratory signals themselves, arterial oxygen saturation, EMG and EEG. Wakefulness was confirmed using EEG. When the amplitude of the EMG signal that detected any body movements was high, that part of the signal was considered to have occurred during movement and was determined to be inappropriate for analysis. Epochs including apneas and hypopneas were also excluded.

### 2.4. Analysis of Respiratory Signals

Five minutes of stable respiratory signals were analyzed. The breath-to-breath time was calculated for each respiration. To assess breathing irregularities, the coefficient of variation

1  
2  
3  
4  
5  
6 ([standard deviation/mean] × 100) for the breath-to-breath time was calculated. The  
7  
8  
9 respiratory rate was also calculated.

10  
11 Additionally, we examined the amplitude spectrum  $A(f)$  obtained using Fast Fourier  
12  
13 Transform (FFT) for analyzing oscillation patterns in the respiratory signals.  $A(f)$  represents  
14  
15 the amplitude distribution as a function of frequency. To avoid the possibility of spectral  
16  
17 leakage, the signals were windowed by multiplying them by a Hamming window ( $w[n]$ ):  
18  
19  
20  
21

$$22 \quad w[n] = 0.54 - 0.46 \cos(2\pi n/N) \text{ for } n = 0, 1, 2, \dots, N - 1$$

23  
24  
25  
26 Then, the amplitude spectrum of the respiratory signals was analyzed using the FFT of  
27  
28 the Hamming-windowed signal[10]. Furthermore, according to Shannon Entropy, we  
29  
30 determined the spectral entropy  $S$  based on normalized  $A(f)$  in order to assess breathing  
31  
32 irregularities:  
33  
34  
35

$$36 \quad \text{entropy } S = - \sum A(f) \cdot \log_2(A(f))$$

37  
38  
39  
40 To reduce the influence of artifact in the respiratory signals and FFT, we restricted the  
41  
42 frequency of analyzing Shannon Entropy. Based on the results of the breath-to-breath time  
43  
44 analysis (1.7 to 7.6 seconds, namely 0.13 to 0.59 Hz), we determined the validated  
45  
46  
47 frequency of 0.1 Hz to 0.6 Hz.  
48  
49  
50

## 51 52 **2.5. Statistical Analysis**

53  
54  
55 The distribution of data was examined using the Shapiro-Wilk test. If data were normally  
56  
57  
58  
59  
60

1  
2  
3  
4  
5  
6 distributed, one way analysis of variance with Games-Howell post-hoc tests were applied for  
7  
8  
9 group comparisons. If the data deviated significantly from normality, the Kruskal-Wallis test  
10  
11  
12 was used, followed by evaluation with the Mann-Whitney U test for multiple comparisons,  
13  
14  
15 with the p values being corrected according to the Bonferroni method. In correlation analysis,  
16  
17  
18 the Spearman rank correlation coefficient was used. The  $\chi^2$  test was used to compare  
19  
20  
21 categorical variables, such as gender.  
22

23  
24 The diagnostic cutoff points for the coefficient of variation value and Shannon Entropy S  
25  
26 to discriminate between DLB and AD were estimated for each outcome by maximizing the  
27  
28  
29 Youden index. The discrimination ability was assessed by the area under the curve (AUC).  
30  
31  
32 Using this threshold, the sensitivity and specificity were calculated.  
33

34  
35 All of the statistical analyses were performed using the SPSS software program  
36  
37  
38 (version 19.0, SPSS inc., Chicago, IL, USA). Statistical significance was defined as P values  
39  
40  
41 < 0.05.  
42

### 43 44 45 46 **3. RESULTS**

#### 47 48 49 **3.1. Patient Characteristics**

50  
51  
52 Fourteen patients with DLB, twenty-one patients with AD and twelve non-demented  
53  
54  
55 patients were enrolled in this study. Among the fourteen patients in the DLB group, nine  
56  
57  
58  
59  
60

1  
2  
3  
4  
5  
6 patients had probable DLB and five patients had possible DLB. The diagnoses in the five  
7  
8  
9 possible DLB patients were all supported by the typical findings in SPECT: generalized low  
10  
11  
12 uptake, reduced occipital activity, and relatively preserved hippocampal blood flow. Table 1  
13  
14 shows the characteristics of the subjects. The age and sex distributions were not  
15  
16 significantly different among the three groups. No significant difference was found between  
17  
18 the DLB group and the AD group in the MMSE. The use of medications for hypertension,  
19  
20  
21 hyperlipidemia and diabetes mellitus were similar between the groups. Four patients in the  
22  
23  
24 DLB group, five patients in the AD group and no patients in the non-demented group had  
25  
26  
27 taken donepezil.  
28  
29  
30  
31  
32  
33  
34  
35  
36  
37  
38  
39  
40  
41  
42  
43  
44  
45  
46  
47  
48  
49  
50  
51  
52  
53  
54  
55  
56  
57  
58  
59  
60

Table 1 - Characteristics of DLB patients, AD patients and non-demented patients.

| Characteristics    | DLB patients | AD patients | Non-demented | p Value  |
|--------------------|--------------|-------------|--------------|----------|
| Number of subjects | n = 14       | n = 21      | n = 12       |          |
| Age (years)        | 81.5 (5.6)   | 79.6 (7.8)  | 78.5 (4.3)   | n.s.     |
| Sex (men / women)  | 6 / 8        | 7 / 14      | 4 / 8        | n.s.     |
| MMSE               | 21.0 (3.8)   | 21.2 (3.4)  | 27.8 (2.1)   | < 0.001* |
| Hypertension       | 4            | 9           | 3            | n.s.     |
| Hyperlipidemia     | 2            | 1           | 0            | n.s.     |
| Diabetes mellitus  | 1            | 1           | 1            | n.s.     |

Values expressed as mean (standard deviation) or number. \* = one way analysis of variance with Games-Howell post-hoc tests (DLB vs AD : n.s., DLB vs Non-demented : p < 0.001, AD vs Non-demented : p < 0.001); AD = Alzheimer's disease; DLB = Dementia with Lewy bodies; MMSE = Mini-mental State Examination; n.s. = not significant.

### 3.2. Breathing Patterns

Figure 1 shows examples of flow signals during wakefulness for a DLB patient, an AD patient and a non-demented patient. Figure 2 shows examples of the characteristic patterns of the amplitude spectrum  $A(f)$ . The AD patient and the non-demented patients exhibited a sharp peak in the spectrum. On the other hand, the amplitude spectrum of the DLB patient was distributed over the whole displayed frequency area. These tracings indicate the occurrence of more irregular breathing patterns in the DLB patient compared with that observed in the AD patient and the non-demented patients.

The respiratory rates calculated from the average breath-to-breath time in the DLB patients, the AD patients and the non-demented patients were 16.2 (3.2), 17.7 (2.7) and 18.0 (2.3) per min, respectively (mean (standard deviation)). These differences were not statistically significant. On the other hand, the coefficient of variation (CV) value for the breath-to-breath time in the DLB patients was significantly higher than that in either the AD patients or the non-demented patients (13.5 (2.6), 10.0 (3.0) and 9.9 (2.8), respectively) (Figure 3A). To discriminate the DLB patients from the AD patients using the CV value, the most favorable diagnostic threshold was found to be 10.2 (AUC = 0.79). This threshold had a sensitivity of 92.9% and a specificity of 61.9%.

The results of the comparison of Shannon Entropy  $S$  are summarized in Figure 3B. The

1  
2  
3  
4  
5  
6 values of Shannon Entropy S were significantly higher in the DLB patients than in the AD  
7  
8 patients and the non-demented patients (6.35 (0.11), 6.11 (0.29) and 6.16 (0.19),  
9  
10 respectively). To discriminate the DLB patients from the AD patients using the Shannon  
11  
12 Entropy S value, the most favorable diagnostic threshold was found to be 6.18 (AUC = 0.77).  
13  
14  
15  
16  
17 This threshold had a sensitivity of 100% and a specificity of 57.1%.

18  
19  
20 These findings indicate the diversity of breathing frequencies, that is, respiratory  
21  
22  
23  
24  
25  
26  
27  
28  
29  
30  
31  
32  
33  
34  
35  
36  
37  
38  
39  
40  
41  
42  
43  
44  
45  
46  
47  
48  
49  
50  
51  
52  
53  
54  
55  
56  
57  
58  
59  
60  
dysrhythmia, in DLB patients.

### 3.3. Comparison of CV and Shannon Entropy S

In order to assess breathing irregularities, we used two different methods, namely, we  
compare CV and Shannon Entropy S. These two methods are independent approaches to  
the assessment of breathing patterns; however, a significant correlation (Spearman  $r = 0.78$ ,  
 $p < 0.001$ ) was observed between these two values (Figure 4).

## 4. DISCUSSION

In this study, we observed that patients with DLB exhibit dysrhythmic breathing  
compared to patients with AD and non-demented patients.

The modulation of the respiratory rhythm is closely associated with the brainstem. In  
particular, the pre-Bötzinger complex (pre-BötC) and the retro-trapezoid nucleus/parafacial

1  
2  
3  
4  
5  
6 respiratory group (RTN/pFRG) are thought to be very important for respiratory rhythm  
7  
8  
9 regulation[11-13]. For this reason, respiratory dysrhythmia may occur in cases of brainstem  
10  
11 disorders, such as Wallenberg syndrome and brain tumors. In DLB patients, Lewy bodies  
12  
13 are often seen in the brainstem; however, it remains unknown whether the localization and  
14  
15 density of Lewy bodies are strongly associated with the symptoms of DLB. It is possible,  
16  
17 considering the neurodegenerative aspects of DLB, that localization of Lewy bodies in the  
18  
19 brainstem causes respiratory dysrhythmia. One report has indicated that visual  
20  
21 hallucinations are associated with increased numbers of Lewy bodies in the temporal lobe  
22  
23 and amygdala, each of these areas being implicated in the generation of complex visual  
24  
25 images[14]. In addition, concerning the association between respiration and DLB, Mizukami  
26  
27 et al. reported the occurrence of decreased ventilatory responses to hypercapnia in DLB  
28  
29 patients[15]. Furthermore, respiratory insufficiency, sleep-disordered breathing and central  
30  
31 respiratory failure are known to occur in patients with multiple system atrophy[16,17], which  
32  
33 is an alpha-synucleinopathies, similar to DLB.  
34  
35  
36  
37  
38  
39  
40  
41  
42  
43  
44  
45

46 In this study, we also analyzed the breathing patterns of non-demented patients. The  
47  
48 coefficient of variation for breath-to-breath time in the non-demented patients was not  
49  
50 significantly different from that reported in previous studies of control subjects[18,19]. DLB  
51  
52 patients exhibit many clinical features other than dementia, visual hallucinations and  
53  
54  
55  
56  
57  
58  
59  
60



1  
2  
3  
4  
5  
6 parkinsonism. For example, Rapid Eye Movement sleep behavior disorder, severe  
7  
8  
9 autonomic dysfunctions such as orthostatic hypotension, repeated syncope and  
10  
11  
12 systematized delusions can be seen in DLB patients. Furthermore, in a previous study, we  
13  
14  
15 reported a high frequency of periodic limb movements in DLB patients[20]. The results of the  
16  
17  
18 present study indicating that DLB patients exhibit dysrhythmic breathing compared to  
19  
20  
21 normal subjects suggest that irregular breathing patterns may be a new clinical feature of  
22  
23  
24 DLB.

25  
26 Currently, DLB and AD are diagnosed according to their respective clinical diagnostic  
27  
28  
29 criteria[2,6], and differentiation of these two diseases is frequently difficult. Our findings of  
30  
31  
32 different breathing patterns between DLB and AD patients suggest the usefulness of the  
33  
34  
35 spectral analysis of breathing for discriminating patients with DLB from those with AD.

36  
37  
38 Because the diagnostic threshold had a high sensitivity in our study, the spectral analysis of  
39  
40  
41 breathing may be useful for making an exclusive diagnosis. While the utilization of SPECT  
42  
43  
44 and MIBG myocardial scintigraphy are limited to well-equipped hospitals, the spectral  
45  
46  
47 analysis of breathing can be performed more easily and with lower expenses. As a  
48  
49  
50 screening tool for the diagnosis of DLB, the spectral analysis of breathing patterns may be  
51  
52  
53 cost-effective and useful.

54  
55 The FFT is an important tool for digital signal processing of the information commonly  
56  
57  
58  
59  
60

1  
2  
3  
4  
5  
6 encoded in the sinusoids that form the signal. Additionally, the important information to be  
7  
8  
9 evaluated is the frequency and amplitude of the component sinusoids. To reduce spectral  
10  
11  
12 noise, a Hamming window is used that involves the multiplication of the signal by a smooth  
13  
14  
15 curve. The result is plotted graphically in terms of amplitude and frequency. In addition, we  
16  
17  
18 used Shannon Entropy in this study to quantify the variability of the amplitude spectrum,  
19  
20  
21 namely breathing irregularities. This measure has been widely used in a range of biological  
22  
23  
24 applications where quantitative descriptions of data regularity are required[21,22]. The  
25  
26  
27 Shannon Entropy indicates the degree of uncertainty and is higher when the variability of the  
28  
29  
30 parameter is greater.

31  
32 There are several limitations to the present study. First, we included patients with  
33  
34 possible DLB and probable DLB in the same DLB group. Additionally, we did not make a  
35  
36  
37 pathological diagnosis of DLB or AD. A prospective investigation on the course of breathing  
38  
39  
40 patterns and cognitive impairment, including the eventual pathological diagnosis, should be  
41  
42  
43 examined in a future study. Second, no arterial blood gas analyses were performed.  
44  
45  
46 Therefore, a possible effect of hypercapnia or hypocapnia on breathing cannot be excluded.  
47  
48  
49 To evaluate more precisely, arterial blood gas analyses should be examined in a future study,  
50  
51  
52 as well. Third, the number of patients in each group was relatively small. However, our data  
53  
54  
55 provide the first evidence of irregular breathing in DLB patients. In a future study, an  
56  
57  
58  
59  
60

1  
2  
3  
4  
5  
6 additional investigation involving a larger number of subjects should be performed.  
7  
8

9 In conclusion, we found that DLB patients exhibit dysrhythmic breathing compared to  
10  
11 that observed in AD patients and non-demented patients. Ataxic breathing may be a new  
12  
13 clinical feature of DLB, and the spectral analysis of breathing patterns may be clinically  
14  
15 useful for the diagnostic differentiation of DLB from AD.  
16  
17  
18  
19  
20  
21  
22

23 **Acknowledgments:** This work was supported by grants-in-aid for young scientists and  
24  
25 scientific research from the Ministry of Education, Science, Sports and Culture of Japan, and  
26  
27 Research Grants from the Mitsui Sumitomo Insurance Welfare Foundation. These funding  
28  
29 sources had no involvement in the study, design, analysis, interpretation or decision to  
30  
31 submit this work. We thank all participants.  
32  
33  
34  
35  
36  
37  
38  
39  
40

41 **Declaration of Interest:** This was not an industry supported study. The authors have  
42  
43 indicated no financial conflicts of interest.  
44  
45  
46  
47  
48

49 **Authorship responsibility:** Shinichiro Hibi was involved in design, analysis, interpretation,  
50  
51 and drafting of article. Yasuhiro Yamaguchi was responsible for conception, design, analysis,  
52  
53 interpretation, and drafting of article. Yumi Umeda-Kameyama and Katsuya Iijima were  
54  
55  
56  
57  
58  
59  
60

1  
2  
3  
4  
5  
6 involved in design. Miwako Takahashi and Toshimitsu Momose were involved in analysis.  
7

8  
9 Masahiro Akishita and Yasuyoshi Ouchi were involved in design and interpretation. All

10  
11 authors had full access to the data and take responsibility for its integrity and the accuracy of  
12  
13 the analysis.  
14  
15

16  
17  
18  
19  
20 **Ethics of investigation:** The study was approved by the institutional review board of the

21  
22 Graduate School of Medicine, University of Tokyo, and written informed consent was

23  
24  
25 obtained from all participants before the study.  
26  
27

28  
29 **Data sharing:** All authors had full access to the data and take responsibility for its integrity

30  
31  
32 and the accuracy of the analysis.  
33  
34  
35  
36  
37  
38  
39  
40  
41  
42  
43  
44  
45  
46  
47  
48  
49  
50  
51  
52  
53  
54  
55  
56  
57  
58  
59  
60

## References

- [1] McKeith IG, Galasko D, Kosaka K, et al. Consensus guidelines for the clinical and pathologic diagnosis of dementia with Lewy bodies: Report of the consortium on DLB international workshop. *Neurology* 1996;47:1113-24.
- [2] McKeith IG, Dickson DW, Lowe J, et al. Diagnosis and management of dementia with Lewy bodies: Third report of the DLB consortium. *Neurology* 2005;65:1863-72.
- [3] Lobotesis K, Fenwick JD, Phipps A, et al. Occipital hypoperfusion on SPECT in dementia with Lewy bodies but not AD. *Neurology* 2001;56:643-9.
- [4] Yoshita M, Taki J, Yamada M. A clinical role for [(123)I]MIBG myocardial scintigraphy in the distinction between dementia of the Alzheimer's-type and dementia with Lewy bodies. *J Neurol Neurosurg Psychiatry* 2001;71:583-8.
- [5] Hanyu H, Shimizu S, Hirao K, et al. Comparative value of brain perfusion SPECT and [(123)I]MIBG myocardial scintigraphy in distinguishing between dementia with Lewy bodies and Alzheimer's disease. *Eur J Nucl Med Mol Imaging* 2006;33:248-53.

- 1  
2  
3  
4  
5  
6 [6] McKhann G, Drachman D, Folstein M, et al. Clinical diagnosis of Alzheimer's disease:  
7  
8  
9 report of the NINCDS-ADRDA Work Group under the auspices of Department of Health and  
10  
11  
12 Human Services Task Force on Alzheimer's Disease. *Neurology* 1984;34:939-44.  
13  
14  
15  
16 [7] Rice JE, Antic R, Thompson PD. Disordered respiration as a levodopa-induced  
17  
18  
19 dyskinesia in Parkinson's disease. *Mov Disord* 2002;17:524-27.  
20  
21  
22  
23 [8] Ferguson LM, Drummond GB. Acute effects of fentanyl on breathing pattern in  
24  
25  
26 anaesthetized subjects. *Br J Anaesth* 2006;96:384-90.  
27  
28  
29  
30 [9] Iber C, Ancoli-Israel S, Chesson A, et al. for the American Academy of Sleep Medicine.  
31  
32  
33 The AASM manual for the scoring of sleep and associated events; rules, terminology and  
34  
35  
36 technical specifications. 1st ed. Westchester, IL: American Academy of Sleep Medicine,  
37  
38  
39 2007.  
40  
41  
42  
43 [10] Stearns SD, Hush DR. Digital signal analysis. 2nd ed. Englewood Cliffs, NJ: Prentice  
44  
45  
46 Hall International Editions. 1990:155-62.  
47  
48  
49  
50 [11] Mulkey DK, Stornetta RL, Weston MC, et al. Respiratory control by ventral surface  
51  
52  
53 chemoreceptor neurons in rats. *Nat Neurosci* 2004;7:1360-9.  
54  
55  
56  
57  
58  
59  
60

1  
2  
3  
4  
5  
6 [12] Onimaru H, Homma I. A novel functional neuron group for respiratory rhythm generation  
7  
8  
9 in the ventral medulla. *J Neurosci* 2003;23:1478-86.

10  
11  
12  
13 [13] Smith JC, Ellenberger HH, Ballanyi K, et al. Pre-Bötzinger complex: a brainstem region  
14  
15  
16 that may generate respiratory rhythm in mammals. *Science* 1991;254:726-9.

17  
18  
19  
20 [14] Harding AJ, Broe GA, Halliday GM. Visual hallucinations in Lewy body disease relate to  
21  
22  
23 Lewy bodies in the temporal lobe. *Brain* 2002;125:391-403.

24  
25  
26  
27 [15] Mizukami K, Homma T, Aonuma K, et al. Decreased ventilatory response to  
28  
29  
30 hypercapnia in dementia with Lewy bodies. *Ann Neurol* 2009;65:614-7.

31  
32  
33  
34 [16] Schwarzacher SW, Rüb U, Deller T. Neuroanatomical characteristics of the human  
35  
36  
37 pre-Bötzinger complex and its involvement in neurodegenerative brainstem diseases. *Brain*  
38  
39  
40 2011;134:24-35.

41  
42  
43  
44 [17] Glass GA, Josephs KA, Ahlskog JE. Respiratory insufficiency as the primary presenting  
45  
46  
47 symptom of multiple-system atrophy. *Arch Neurol* 2006;63:978-81.

48  
49  
50  
51 [18] Wuyts R, Vlemincx E, Bogaerts K, et al. Sigh rate and respiratory variability during  
52  
53  
54 normal breathing and the role of negative affectivity. *Int J Psychophysiol* 2011;82:175-9.

1  
2  
3  
4  
5  
6 [19] Yamauchi M, Tamaki S, Yoshikawa M, et al. Differences in breathing patterning during  
7  
8 wakefulness in patients with mixed apnea-dominant vs obstructive-dominant sleep apnea.

9  
10  
11 *Chest* 2011;140:54-61.

12  
13  
14  
15  
16 [20] Hibi S, Yamaguchi Y, Umeda-Kameyama Y, et al. The high frequency of periodic limb  
17  
18 movements in patients with Lewy body dementia. *J Psychiatr Res* 2012;46:1590-4.

19  
20  
21  
22 [21] Webber CL Jr, Zbilut JP. Dynamical assessment of physiological systems and states  
23  
24 using recurrence plot strategies. *J Appl Physiol* 1994;76:965-73.

25  
26  
27  
28  
29 [22] Larsen PD, Trent EL, Galletly DC. Cardioventilatory coupling: effects of IPPV. *Br J*  
30  
31 *Anaesth* 1999;82:546-50.

### 32 33 34 35 36 37 38 39 40 **Figure legends**

41  
42  
43  
44 Figure 1 – Typical flow patterns of a DLB patient (A), an AD patient (B) and a non-demented  
45  
46 patient (C) observed in epochs of five minutes. Respiratory pattern is more irregular in the  
47  
48 DLB patient as compared with the AD patient and the non-demented patients. AD =  
49  
50  
51  
52  
53  
54 Alzheimer's disease; DLB = Dementia with Lewy bodies.



1  
2  
3  
4  
5  
6 Figure 2 – The typical power spectrum of a DLB patient (A), an AD patient (B) and a  
7  
8  
9 non-demented patient (C) obtained by Fast Fourier Transform. The amplitude spectrum of  
10  
11  
12 the DLB patient is distributed over the whole displayed frequency. AD = Alzheimer's  
13  
14  
15 disease; DLB = Dementia with Lewy bodies; A(f) = amplitude spectrum.  
16  
17

18  
19 Figure 3 – (A) Coefficient of variation for breath-to-breath respiratory time in DLB patients,  
20  
21  
22 AD patients and non-demented patients. One way analysis of variance with Games-Howell  
23  
24  
25 post-hoc tests; significant differences in DLB vs AD ( $p = 0.003$ ) and DLB vs non-demented  
26  
27  
28 ( $p = 0.008$ ). (B) The comparison of Shannon Entropy S in DLB patients, AD patients and  
29  
30  
31 non-demented subjects. One way analysis of variance with Games-Howell post-hoc tests;  
32  
33  
34 significant differences in DLB vs AD ( $p = 0.005$ ) and DLB vs non-demented ( $p = 0.016$ ).  
35  
36  
37 Values are mean  $\pm$  standard deviation. AD = Alzheimer's disease; DLB = Dementia with  
38  
39  
40 Lewy bodies; n.s. = not significant; CV = coefficient of variation.  
41  
42

43  
44 Figure 4 – Scatterplot showing the relationship between the coefficient of variation for  
45  
46  
47 breath-to-breath respiratory time and the value of Shannon Entropy S. A significant  
48  
49  
50 correlation ( $r = 0.78$ ,  $p < 0.001$ ) was found between the CV and the Shannon Entropy S. CV  
51  
52  
53 = coefficient of variation.  
54  
55  
56  
57  
58  
59  
60

1  
2  
3  
4  
5  
6  
7  
8  
9  
10  
11  
12  
13  
14  
15  
16  
17  
18  
19  
20  
21  
22  
23  
24  
25  
26  
27  
28  
29  
30  
31  
32  
33  
34  
35  
36  
37  
38  
39  
40  
41  
42  
43  
44  
45  
46  
47  
48  
49  
50  
51  
52  
53  
54  
55  
56  
57  
58  
59  
60

(A)

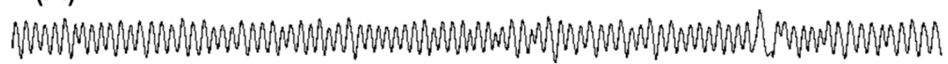

(B)

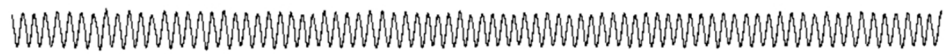

(C)

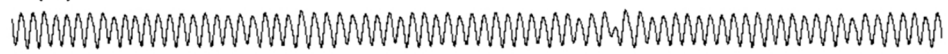

.....

.....

review only

1  
2  
3  
4  
5  
6  
7  
8  
9  
10  
11  
12  
13  
14  
15  
16  
17  
18  
19  
20  
21  
22  
23  
24  
25  
26  
27  
28  
29  
30  
31  
32  
33  
34  
35  
36  
37  
38  
39  
40  
41  
42  
43  
44  
45  
46  
47  
48  
49  
50  
51  
52  
53  
54  
55  
56  
57  
58  
59  
60

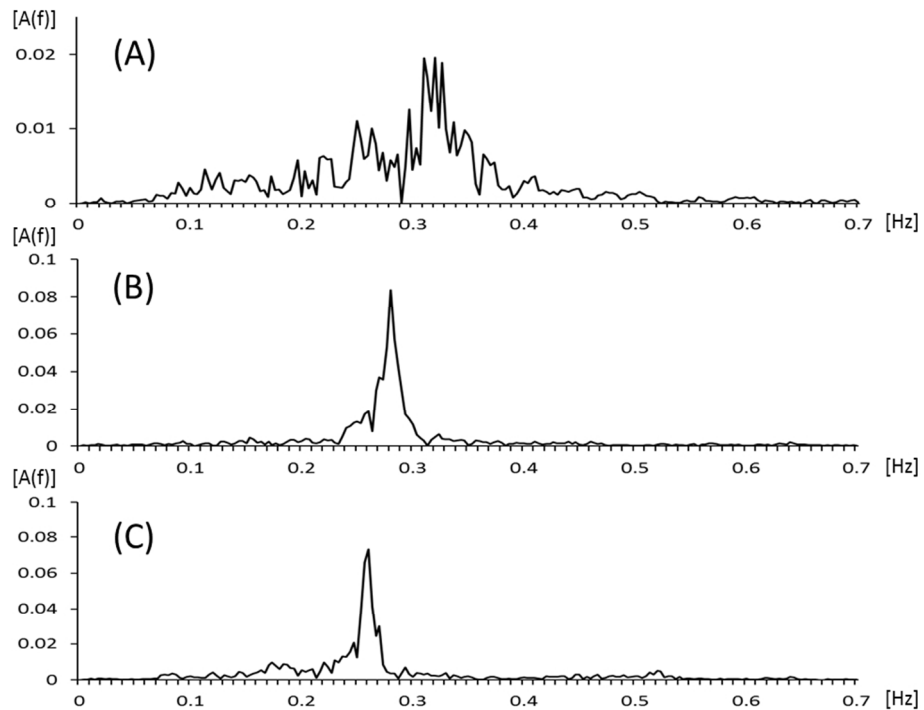

Review only

1  
2  
3  
4  
5  
6  
7  
8  
9  
10  
11  
12  
13  
14  
15  
16  
17  
18  
19  
20  
21  
22  
23  
24  
25  
26  
27  
28  
29  
30  
31  
32  
33  
34  
35  
36  
37  
38  
39  
40  
41  
42  
43  
44  
45  
46  
47  
48  
49  
50  
51  
52  
53  
54  
55  
56  
57  
58  
59  
60

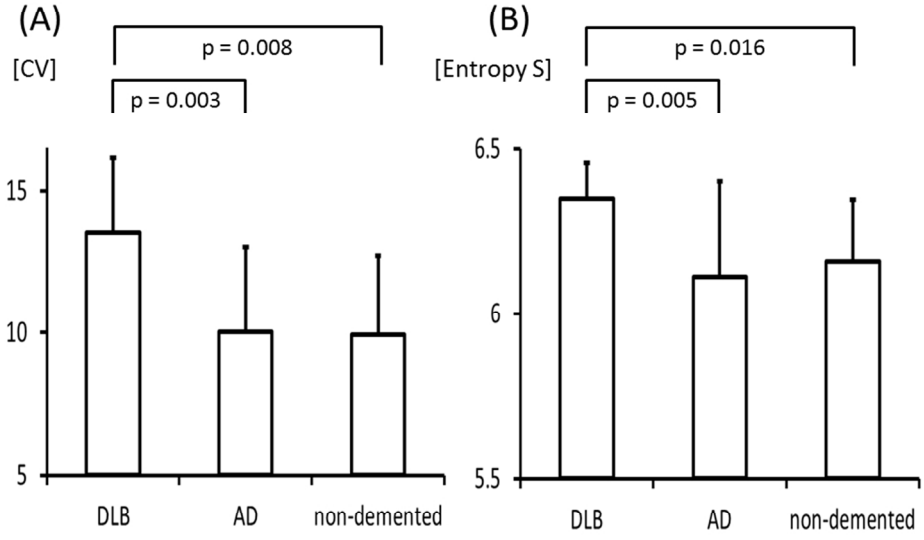

Review only

1  
2  
3  
4  
5  
6  
7  
8  
9  
10  
11  
12  
13  
14  
15  
16  
17  
18  
19  
20  
21  
22  
23  
24  
25  
26  
27  
28  
29  
30  
31  
32  
33  
34  
35  
36  
37  
38  
39  
40  
41  
42  
43  
44  
45  
46  
47  
48  
49  
50  
51  
52  
53  
54  
55  
56  
57  
58  
59  
60

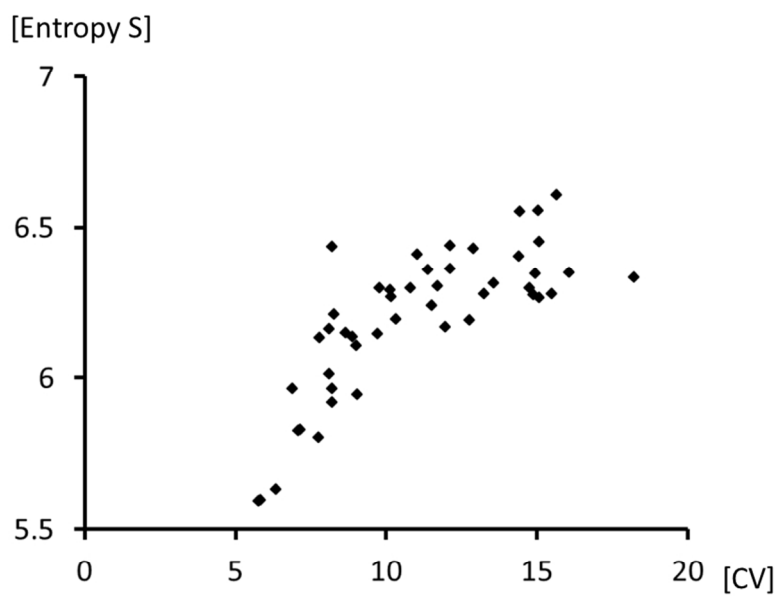

review only

STROBE Statement—Checklist of items that should be included in reports of *cross-sectional studies*

|                              | Item No | Recommendation                                                                                                                                                                                                                                                                                                                                                                                                |
|------------------------------|---------|---------------------------------------------------------------------------------------------------------------------------------------------------------------------------------------------------------------------------------------------------------------------------------------------------------------------------------------------------------------------------------------------------------------|
| <b>Title and abstract</b>    | 1       | (a) Indicate the study's design with a commonly used term in the title or the abstract<br>(b) Provide in the abstract an informative and balanced summary of what was done and what was found                                                                                                                                                                                                                 |
| <b>Introduction</b>          |         |                                                                                                                                                                                                                                                                                                                                                                                                               |
| Background/rationale         | 2       | Explain the scientific background and rationale for the investigation being reported                                                                                                                                                                                                                                                                                                                          |
| Objectives                   | 3       | State specific objectives, including any prespecified hypotheses                                                                                                                                                                                                                                                                                                                                              |
| <b>Methods</b>               |         |                                                                                                                                                                                                                                                                                                                                                                                                               |
| Study design                 | 4       | Present key elements of study design early in the paper                                                                                                                                                                                                                                                                                                                                                       |
| Setting                      | 5       | Describe the setting, locations, and relevant dates, including periods of recruitment, exposure, follow-up, and data collection                                                                                                                                                                                                                                                                               |
| Participants                 | 6       | (a) Give the eligibility criteria, and the sources and methods of selection of participants                                                                                                                                                                                                                                                                                                                   |
| Variables                    | 7       | Clearly define all outcomes, exposures, predictors, potential confounders, and effect modifiers. Give diagnostic criteria, if applicable                                                                                                                                                                                                                                                                      |
| Data sources/<br>measurement | 8*      | For each variable of interest, give sources of data and details of methods of assessment (measurement). Describe comparability of assessment methods if there is more than one group                                                                                                                                                                                                                          |
| Bias                         | 9       | Describe any efforts to address potential sources of bias                                                                                                                                                                                                                                                                                                                                                     |
| Study size                   | 10      | Explain how the study size was arrived at                                                                                                                                                                                                                                                                                                                                                                     |
| Quantitative variables       | 11      | Explain how quantitative variables were handled in the analyses. If applicable, describe which groupings were chosen and why                                                                                                                                                                                                                                                                                  |
| Statistical methods          | 12      | (a) Describe all statistical methods, including those used to control for confounding<br>(b) Describe any methods used to examine subgroups and interactions<br>(c) Explain how missing data were addressed<br>(d) If applicable, describe analytical methods taking account of sampling strategy<br>(e) Describe any sensitivity analyses                                                                    |
| <b>Results</b>               |         |                                                                                                                                                                                                                                                                                                                                                                                                               |
| Participants                 | 13*     | (a) Report numbers of individuals at each stage of study—eg numbers potentially eligible, examined for eligibility, confirmed eligible, included in the study, completing follow-up, and analysed<br>(b) Give reasons for non-participation at each stage<br>(c) Consider use of a flow diagram                                                                                                               |
| Descriptive data             | 14*     | (a) Give characteristics of study participants (eg demographic, clinical, social) and information on exposures and potential confounders<br>(b) Indicate number of participants with missing data for each variable of interest                                                                                                                                                                               |
| Outcome data                 | 15*     | Report numbers of outcome events or summary measures                                                                                                                                                                                                                                                                                                                                                          |
| Main results                 | 16      | (a) Give unadjusted estimates and, if applicable, confounder-adjusted estimates and their precision (eg, 95% confidence interval). Make clear which confounders were adjusted for and why they were included<br>(b) Report category boundaries when continuous variables were categorized<br>(c) If relevant, consider translating estimates of relative risk into absolute risk for a meaningful time period |
| Other analyses               | 17      | Report other analyses done—eg analyses of subgroups and interactions, and sensitivity analyses                                                                                                                                                                                                                                                                                                                |

|                          |    |                                                                                                                                                                            |
|--------------------------|----|----------------------------------------------------------------------------------------------------------------------------------------------------------------------------|
| <b>Discussion</b>        |    |                                                                                                                                                                            |
| Key results              | 18 | Summarise key results with reference to study objectives                                                                                                                   |
| Limitations              | 19 | Discuss limitations of the study, taking into account sources of potential bias or imprecision. Discuss both direction and magnitude of any potential bias                 |
| Interpretation           | 20 | Give a cautious overall interpretation of results considering objectives, limitations, multiplicity of analyses, results from similar studies, and other relevant evidence |
| Generalisability         | 21 | Discuss the generalisability (external validity) of the study results                                                                                                      |
| <b>Other information</b> |    |                                                                                                                                                                            |
| Funding                  | 22 | Give the source of funding and the role of the funders for the present study and, if applicable, for the original study on which the present article is based              |

\*Give information separately for exposed and unexposed groups.

**Note:** An Explanation and Elaboration article discusses each checklist item and gives methodological background and published examples of transparent reporting. The STROBE checklist is best used in conjunction with this article (freely available on the Web sites of PLoS Medicine at <http://www.plosmedicine.org/>, Annals of Internal Medicine at <http://www.annals.org/>, and Epidemiology at <http://www.epidem.com/>). Information on the STROBE Initiative is available at [www.strobe-statement.org](http://www.strobe-statement.org).



**Respiratory dysrhythmia in Dementia with Lewy bodies: a cross-sectional study**

|                                 |                                                                                                                                                                                                                                                                                                                                                                                                                                                                                                                                                                                                                                               |
|---------------------------------|-----------------------------------------------------------------------------------------------------------------------------------------------------------------------------------------------------------------------------------------------------------------------------------------------------------------------------------------------------------------------------------------------------------------------------------------------------------------------------------------------------------------------------------------------------------------------------------------------------------------------------------------------|
| Journal:                        | <i>BMJ Open</i>                                                                                                                                                                                                                                                                                                                                                                                                                                                                                                                                                                                                                               |
| Manuscript ID:                  | bmjopen-2013-002870.R1                                                                                                                                                                                                                                                                                                                                                                                                                                                                                                                                                                                                                        |
| Article Type:                   | Research                                                                                                                                                                                                                                                                                                                                                                                                                                                                                                                                                                                                                                      |
| Date Submitted by the Author:   | 31-Jul-2013                                                                                                                                                                                                                                                                                                                                                                                                                                                                                                                                                                                                                                   |
| Complete List of Authors:       | Hibi, Shinichiro; The University of Tokyo, Department of Geriatric Medicine<br>Yamaguchi, Yasuhiro; The University of Tokyo, Department of Geriatric Medicine<br>Umeda-Kameyama, Yumi; The University of Tokyo, Department of Geriatric Medicine<br>Iijima, Katsuya; The University of Tokyo, Department of Geriatric Medicine<br>Takahashi, Miwako; The University of Tokyo, Department of Radiology<br>Momose, Toshimitsu; The University of Tokyo, Department of Radiology<br>Akishita, Masahiro; The University of Tokyo, Department of Geriatric Medicine<br>Ouchi, Yasuyoshi; The University of Tokyo, Department of Geriatric Medicine |
| <b>Primary Subject Heading</b>: | Neurology                                                                                                                                                                                                                                                                                                                                                                                                                                                                                                                                                                                                                                     |
| Secondary Subject Heading:      | Respiratory medicine                                                                                                                                                                                                                                                                                                                                                                                                                                                                                                                                                                                                                          |
| Keywords:                       | Dementia < NEUROLOGY, RESPIRATORY MEDICINE (see Thoracic Medicine), SLEEP MEDICINE                                                                                                                                                                                                                                                                                                                                                                                                                                                                                                                                                            |
|                                 |                                                                                                                                                                                                                                                                                                                                                                                                                                                                                                                                                                                                                                               |

SCHOLARONE™  
Manuscripts



1  
2  
3  
4  
5  
6 **Respiratory dysrhythmia in Dementia with Lewy bodies: a cross-sectional study**  
7  
8  
9

10  
11 Shinichiro Hibi<sup>1</sup>, Yasuhiro Yamaguchi<sup>1\*</sup>, Yumi Umeda-Kameyama<sup>1</sup>, Katsuya Iijima<sup>1</sup>, Miwako

12  
13  
14 Takahashi<sup>2</sup>, Toshimitsu Momose<sup>2</sup>, Masahiro Akishita<sup>1</sup>, Yasuyoshi Ouchi<sup>1</sup>  
15  
16  
17  
18  
19

20  
21 <sup>1</sup>Department of Geriatric Medicine, Graduate School of Medicine, The University of Tokyo,  
22

23  
24 <sup>2</sup>Department of Radiology, Graduate School of Medicine, The University of Tokyo,  
25  
26  
27

28  
29 \*Corresponding to Yasuhiro Yamaguchi  
30

31  
32 Department of Geriatric Medicine, Graduate School of Medicine, The University of Tokyo,  
33

34  
35 7-3-1 Hongo, Bunkyo-ku, Tokyo, 113-0033, Japan  
36

37  
38 TEL 81-3-5800-8652  
39

40  
41 FAX 81-3-5800-6530  
42  
43  
44  
45

46  
47 Key words: ataxic breathing, dementia with Lewy bodies, Alzheimer's disease,  
48

49  
50 polysomnographic recordings, Fast Fourier Transform  
51  
52  
53  
54

55  
56 Word count: 2841 words  
57  
58  
59  
60

1  
2  
3  
4  
5  
6 Article Focus  
7  
8

9 In this study, we first indicated the presence of dysrhythmic breathing in the patients with  
10  
11 Dementia with Lewy bodies, compared to the patients with Alzheimer's disease and the  
12  
13 patients without dementia.  
14  
15  
16  
17  
18  
19

20 Key messages  
21  
22

23 The dysrhythmia of the breath-to-breath time on bed rest with closed eyes is significantly  
24  
25 higher in the patients with Dementia with Lewy bodies.  
26  
27  
28  
29  
30  
31

32 The recording of the breath-to-breath time on bed rest with closed eyes can be a useful  
33  
34 marker for the diagnosis of Dementia with Lewy bodies.  
35  
36  
37  
38  
39  
40

41 Strengths and Limitations  
42  
43

44 Dysrhythmic breathing is a completely novel topic in Dementia with Lewy bodies.  
45  
46  
47  
48

49 This study is a cross-sectional, small-sized pilot study.  
50  
51  
52  
53  
54

55 The pathological diagnosis of Dementia with Lewy bodies could not be obtained.  
56  
57  
58  
59  
60

**ABSTRACT**

**Objectives:** Dementia with Lewy bodies (DLB) is the second most common form of neurodegenerative dementia after Alzheimer's disease (AD). DLB is characterized by intracytoplasmic inclusions called Lewy bodies that are often seen in the brainstem. Because modulation of the respiratory rhythm is one of the most important functions of the brainstem, DLB patients may exhibit dysrhythmic breathing. This hypothesis has not yet been systematically studied. Therefore, we evaluated the association between DLB and dysrhythmic breathing.

**Design:** This was a cross-sectional study where consecutive inpatients who were admitted for the evaluation of progressive cognitive impairment were enrolled. We assessed breathing irregularity using polysomnographic recordings on bed rest with closed eyes, without reference to the clinical differentiation among DLB, AD and having no dementia.

**Setting:** Single center in Japan.

**Participants:** Fourteen DLB patients, twenty-one AD patients and twelve patients without dementia were enrolled in this study.

**Primary outcome measures:** The coefficient of variation (CV) of the breath-to-breath time was calculated. We also examined the amplitude spectrum  $A(f)$  obtained using the Fast Fourier Transform and Shannon Entropy  $S$  of  $A(f)$  in DLB patients compared to AD patients

1  
2  
3  
4  
5  
6 and patients without dementia.  
7

8  
9 **Results:** The values of CV and Entropy S were significantly higher in the DLB patients than  
10  
11 in the AD patients and patients without dementia. No significant differences were found  
12  
13 between the AD patients and the patients without dementia.  
14  
15

16  
17 **Conclusions:** DLB patients exhibit dysrhythmic breathing compared to AD patients and  
18  
19 patients without dementia. Dysrhythmic breathing is a new clinical feature of DLB and the  
20  
21 spectral analysis of breathing patterns can be clinically useful for the diagnostic  
22  
23 differentiation of DLB from AD.  
24  
25  
26  
27  
28  
29  
30  
31  
32  
33  
34  
35  
36  
37  
38  
39  
40  
41  
42  
43  
44  
45  
46  
47  
48  
49  
50  
51  
52  
53  
54  
55  
56  
57  
58  
59  
60

## 1. INTRODUCTION

Dementia with Lewy bodies (DLB) is a neurodegenerative disease characterized by parkinsonism, visual hallucinations and cognitive fluctuations. DLB is now thought to be the second most common form of dementia after Alzheimer's disease (AD), affecting 15-25% of elderly demented patients[1]. The clinical diagnostic criteria for DLB were first published in 1996 and modified in 2005[1,2]. The central feature of DLB is progressive cognitive decline. The core features include recurrent visual hallucinations, spontaneous features of parkinsonism and fluctuating cognition with pronounced variations in attention and alertness. These diagnostic criteria require clinical evaluation by a trained neurologist and include few objective markers. Although Single Photon Emission Computed Tomography (SPECT) and  $^{123}\text{I}$ -metaiodobenzylguanidine (MIBG) myocardial scintigraphy are useful for making the differential diagnosis of DLB[3-5], these examinations are too expensive to be generally utilized. DLB is characterized by intracytoplasmic inclusions called Lewy bodies that consist of filamentous protein granules composed of alpha-synuclein and ubiquitin. Lewy bodies are often seen in the brainstem and in limbic and cortical neurons[2]. On the other hand, the brainstem serves as the connection among the cerebral hemispheres and the cerebellum, and is responsible for basic vital functions. Modulation of the respiratory rhythm is one of the most important functions of the brainstem. In cases of brain disorders, such as Wallenberg

1  
2  
3  
4  
5  
6 syndrome and brain tumors, it is known that respiratory patterns sometimes become ataxic.  
7  
8  
9 Because brainstem neurodegeneration is often seen in patients with DLB, the respiratory  
10  
11 patterns of DLB patients might be dysrhythmic. However, this hypothesis has not yet been  
12  
13 systematically studied and no controlled data have been published to date. The present  
14  
15 investigation was performed in patients with DLB, patients with AD and patients without  
16  
17 dementia to assess and compare breathing patterns. In addition, we evaluated the  
18  
19 usefulness of the measurement of breathing patterns as a novel tool to aid the differential  
20  
21 diagnosis of dementia.  
22  
23  
24  
25  
26  
27  
28  
29  
30  
31

## 32 **2. METHODS**

### 33 **2.1. Subjects**

34  
35  
36 The study population comprised consecutive inpatients of the Department of Geriatric  
37  
38 Medicine at the University of Tokyo Hospital, who were admitted for the evaluation of  
39  
40 progressive cognitive impairment. The patients underwent neuropsychological assessments,  
41  
42 including the Mini-Mental State Examination (MMSE), blood tests, and neuroimaging tests  
43  
44 (Magnetic Resonance Imaging (MRI) and SPECT). The diagnosis was made at a  
45  
46 consensus conference of physicians and neurologists. The diagnosis of DLB was based on  
47  
48 the clinical diagnostic criteria proposed by McKeith et al in 2005[2]. And AD was diagnosed  
49  
50  
51  
52  
53  
54  
55  
56  
57  
58  
59  
60

1  
2  
3  
4  
5  
6 in accordance with the National Institute of Neurological and Communicative Disorders and  
7  
8  
9 Stroke and the Alzheimer's disease and Related Disorders Association (NINCDS-ADRDA)  
10  
11  
12 [6]. The group without dementia comprised the patients who did not fit the criteria for  
13  
14  
15 dementia in the medical and neurological examinations. Between November 2010 and June  
16  
17  
18 2012, 70 patients were enrolled in this study.

19  
20  
21 The study was approved by the institutional review board of the Graduate School of  
22  
23  
24 Medicine, University of Tokyo, and written informed consent was obtained from all  
25  
26  
27 participants before the study.

## 28 29 **2.2. Exclusion Criteria**

30  
31  
32 We evaluated the breathing patterns of DLB patients, AD patients and patients without  
33  
34  
35 dementia. Patients with cognitive impairments other than AD or DLB (e.g. normal pressure  
36  
37  
38 hydrocephalus, vascular dementia) were excluded.

39  
40  
41 Breathing irregularities are associated with certain environments such as high altitudes,  
42  
43  
44 medical conditions such as heart failure and chronic obstructive pulmonary disease, and the  
45  
46  
47 usage of opioids or levodopa[7,8]. We excluded one patient who reported breathing  
48  
49  
50 problems, including dyspnea. We also excluded four patients who were taking levodopa and  
51  
52  
53 dopamine-agonists. No patients were using opioids. We excluded three patients whose  
54  
55  
56 recorded respiratory signal data were insufficient due to noise.  
57  
58  
59  
60

### 2.3. Recordings of respiration

The patients underwent thirty minutes or more of recordings of respiration on bed rest with closed eyes in the inpatient ward by using the device for polysomnography (Somnotrac Pro, CareFusion, San Diego, CA, USA). The recordings included two electroencephalogram (EEG) leads (C3-A2 and O2-A1), electrooculogram and submental electromyogram (EMG). Oronasal thermistor channel and arterial oxygen saturation (finger oximetry) were also monitored. All recordings were scored visually by an experienced rater according to the standard criteria[9].

Five consecutive minutes of stable respiratory signals measured while the patients were awake were extracted from the recordings. Stable respiratory signals during wakefulness were identified using the respiratory signals themselves, arterial oxygen saturation, EMG and EEG. Wakefulness was confirmed using EEG. When the amplitude of the EMG signal that detected any body movements was high, that part of the signal was considered to have occurred during movement and was determined to be inappropriate for analysis. Epochs including apneas and hypopneas were also excluded.

### 2.4. Analysis of Respiratory Signals

Five minutes of stable respiratory signals were analyzed. The breath-to-breath time was calculated for each respiration. To assess breathing irregularities, the coefficient of variation



1  
2  
3  
4  
5  
6 ([standard deviation/mean] × 100) for the breath-to-breath time was calculated. The  
7  
8  
9 respiratory rate was also calculated.

10  
11 Additionally, we examined the amplitude spectrum  $A(f)$  obtained using Fast Fourier  
12 Transform (FFT) for analyzing oscillation patterns in the respiratory signals.  $A(f)$  represents  
13  
14 the amplitude distribution as a function of frequency. To avoid the possibility of spectral  
15  
16 leakage, the signals were windowed by multiplying them by a Hamming window ( $w[n]$ ):  
17  
18  
19  
20  
21

$$22 \quad w[n] = 0.54 - 0.46 \cos(2\pi n/N) \text{ for } n = 0, 1, 2, \dots, N - 1$$

23  
24  
25  
26 Then, the amplitude spectrum of the respiratory signals was analyzed using the FFT of  
27  
28 the Hamming-windowed signal[10]. Furthermore, according to Shannon Entropy, we  
29  
30 determined the spectral entropy  $S$  based on normalized  $A(f)$  in order to assess breathing  
31  
32 irregularities:  
33  
34  
35

$$36 \quad \text{entropy } S = - \sum A(f) \cdot \log_2(A(f))$$

37  
38  
39 To reduce the influence of artifact in the respiratory signals and FFT, we restricted the  
40  
41 frequency of analyzing Shannon Entropy. Based on the results of the breath-to-breath time  
42  
43 analysis (1.7 to 7.6 seconds, namely 0.13 to 0.59 Hz), we determined the validated  
44  
45 frequency of 0.1 Hz to 0.6 Hz.  
46  
47  
48  
49  
50

## 51 52 **2.5. Statistical Analysis**

53  
54  
55 The distribution of data was examined using the Shapiro-Wilk test. If data were normally  
56  
57  
58  
59  
60

1  
2  
3  
4  
5  
6 distributed, one way analysis of variance with Games-Howell post-hoc tests were applied for  
7  
8  
9 group comparisons. If the data deviated significantly from normality, the Kruskal-Wallis test  
10  
11  
12 was used, followed by evaluation with the Mann-Whitney U test for multiple comparisons,  
13  
14  
15 with the p values being corrected according to the Bonferroni method. In correlation analysis,  
16  
17  
18 the Spearman rank correlation coefficient was used. The  $\chi^2$  test was used to compare  
19  
20  
21 categorical variables, such as gender.  
22

23  
24 The diagnostic cutoff points for the coefficient of variation value and Shannon Entropy S  
25  
26 to discriminate between DLB and AD were estimated for each outcome by maximizing the  
27  
28  
29 Youden index. The discrimination ability was assessed by the area under the curve (AUC).  
30  
31  
32 Using this threshold, the sensitivity and specificity were calculated.  
33

34  
35 All of the statistical analyses were performed using the SPSS software program  
36  
37  
38 (version 19.0, SPSS inc., Chicago, IL, USA). Statistical significance was defined as P values  
39  
40  
41 < 0.05.  
42

### 43 44 45 46 **3. RESULTS**

#### 47 48 49 **3.1. Patient Characteristics**

50  
51  
52 Fourteen patients with DLB, twenty-one patients with AD and twelve patients without  
53  
54  
55 dementia were enrolled in this study. Among the fourteen patients in the DLB group, nine  
56  
57  
58  
59  
60

1  
2  
3  
4  
5  
6 patients had probable DLB and five patients had possible DLB. The diagnoses in the five  
7  
8  
9 possible DLB patients were all supported by the typical findings in SPECT: generalized low  
10  
11  
12 uptake, reduced occipital activity, and relatively preserved hippocampal blood flow. Table 1  
13  
14 shows the characteristics of the subjects. The age and sex distributions were not  
15  
16  
17 significantly different among the three groups. No significant difference was found between  
18  
19  
20 the DLB group and the AD group in the MMSE. The use of medications for hypertension,  
21  
22  
23 hyperlipidemia and diabetes mellitus were similar between the groups. Four patients in the  
24  
25  
26 DLB group, five patients in the AD group and no patients in the group without dementia had  
27  
28  
29 taken donepezil.  
30  
31  
32  
33  
34  
35  
36  
37  
38  
39  
40  
41  
42  
43  
44  
45  
46  
47  
48  
49  
50  
51  
52  
53  
54  
55  
56  
57  
58  
59  
60

Table 1 - Characteristics of DLB patients, AD patients and patients without dementia.

| Characteristics    | DLB patients | AD patients | Without Dementia | p Value  |
|--------------------|--------------|-------------|------------------|----------|
| Number of subjects | n = 14       | n = 21      | n = 12           |          |
| Age (years)        | 81.5 (5.6)   | 79.6 (7.8)  | 78.5 (4.3)       | n.s.     |
| Sex (men / women)  | 6 / 8        | 7 / 14      | 4 / 8            | n.s.     |
| MMSE               | 21.0 (3.8)   | 21.2 (3.4)  | 27.8 (2.1)       | < 0.001* |
| Hypertension       | 4            | 9           | 3                | n.s.     |
| Hyperlipidemia     | 2            | 1           | 0                | n.s.     |
| Diabetes mellitus  | 1            | 1           | 1                | n.s.     |

Values expressed as mean (standard deviation) or number. \* = one way analysis of variance with Games-Howell post-hoc tests (DLB vs AD : n.s., DLB vs Without Dementia:  $p < 0.001$ , AD vs Without Dementia:  $p < 0.001$ ); AD = Alzheimer's disease; DLB = Dementia with Lewy bodies; MMSE = Mini-mental State Examination; n.s. = not significant.

### 3.2. Breathing Patterns

Figure 1 shows examples of flow signals during wakefulness for a DLB patient, an AD patient and a patient without dementia. Figure 2 shows examples of the characteristic patterns of the amplitude spectrum  $A(f)$ . The AD patient and the patient without dementia exhibited a sharp peak in the spectrum. On the other hand, the amplitude spectrum of the DLB patient was distributed over the whole displayed frequency area. These tracings indicate the occurrence of more irregular breathing patterns in the DLB patient compared with that observed in the AD patient and the patient without dementia.

The respiratory rates calculated from the average breath-to-breath time in the DLB patients, the AD patients and the patients without dementia were 16.2 (3.2), 17.7 (2.7) and 18.0 (2.3) per min, respectively (mean (standard deviation)). These differences were not statistically significant. On the other hand, the coefficient of variation (CV) value for the breath-to-breath time in the DLB patients was significantly higher than that in either the AD patients or the patients without dementia (13.5 (2.6), 10.0 (3.0) and 9.9 (2.8), respectively) (Figure 3A). To discriminate the DLB patients from the AD patients using the CV value, the most favorable diagnostic threshold was found to be 10.2 (AUC = 0.79). This threshold had a sensitivity of 92.9% and a specificity of 61.9%.

1  
2  
3  
4  
5  
6 The results of the comparison of Shannon Entropy S are summarized in Figure 3B. The  
7  
8  
9 values of Shannon Entropy S were significantly higher in the DLB patients than in the AD  
10  
11  
12 patients and the patients without dementia (6.35 (0.11), 6.11 (0.29) and 6.16 (0.19),  
13  
14  
15 respectively). To discriminate the DLB patients from the AD patients using the Shannon  
16  
17  
18 Entropy S value, the most favorable diagnostic threshold was found to be 6.18 (AUC = 0.77).  
19  
20  
21 This threshold had a sensitivity of 100% and a specificity of 57.1%.

22  
23  
24 These findings indicate the diversity of breathing frequencies, that is, respiratory  
25  
26  
27 dysrhythmia, in DLB patients.

### 28 29 **3.3. Comparison of CV and Shannon Entropy S**

30  
31  
32 In order to assess breathing irregularities, we used two different methods, namely, we  
33  
34  
35 compare CV and Shannon Entropy S. These two methods are independent approaches to  
36  
37  
38 the assessment of breathing patterns; however, a significant correlation (Spearman  $r = 0.78$ ,  
39  
40  
41  $p < 0.001$ ) was observed between these two values (Figure 4).  
42  
43  
44  
45  
46

## 47 **4. DISCUSSION**

48  
49 In this study, we observed that patients with DLB exhibit dysrhythmic breathing  
50  
51  
52 compared to patients with AD and patients without dementia.  
53  
54

55 The modulation of the respiratory rhythm is closely associated with the brainstem[11]. In  
56  
57  
58  
59  
60

1  
2  
3  
4  
5  
6 particular, the pre-Bötzinger complex (pre-BötC) and the retro-trapezoid nucleus/parafacial  
7  
8  
9 respiratory group (RTN/pFRG) are thought to be very important for respiratory rhythm  
10  
11  
12 regulation[12-14]. For this reason, respiratory dysrhythmia may occur in cases of brainstem  
13  
14  
15 disorders, such as Wallenberg syndrome and brain tumors. In DLB patients, Lewy bodies  
16  
17  
18 are often seen in the brainstem; however, it remains unknown whether the localization and  
19  
20  
21 density of Lewy bodies are strongly associated with the symptoms of DLB. It is possible,  
22  
23  
24 considering the neurodegenerative aspects of DLB, that localization of Lewy bodies in the  
25  
26  
27 brainstem causes respiratory dysrhythmia. One report has indicated that visual  
28  
29  
30 hallucinations are associated with increased numbers of Lewy bodies in the temporal lobe  
31  
32  
33 and amygdala, each of these areas being implicated in the generation of complex visual  
34  
35  
36 images[15]. In addition, concerning the association between respiration and DLB, Mizukami  
37  
38  
39 et al. reported the occurrence of decreased ventilatory responses to hypercapnia in DLB  
40  
41  
42 patients[16]. Furthermore, respiratory insufficiency, sleep-disordered breathing and central  
43  
44  
45 respiratory failure are known to occur in patients with multiple system atrophy[17,18], which  
46  
47  
48 is an alpha-synucleinopathies, similar to DLB.

49  
50 In this study, we also analyzed the breathing patterns of patients without dementia. The  
51  
52  
53 coefficient of variation for breath-to-breath time in the patients without dementia was not  
54  
55  
56 significantly different from that reported in previous studies of control subjects[19,20].  
57  
58  
59  
60

1  
2  
3  
4  
5  
6 Although the complication with hypertension was greater in AD group than in DLB  
7  
8  
9 group, no significant differences were found in the measures of breathing patterns  
10  
11  
12 between the patients with hypertension and the patients without hypertension (data  
13  
14  
15 not shown).

16  
17 DLB patients exhibit many clinical features other than dementia, visual hallucinations  
18  
19 and parkinsonism. For example, Rapid Eye Movement sleep behavior disorder, severe  
20  
21 autonomic dysfunctions such as orthostatic hypotension, repeated syncope and  
22  
23 systematized delusions can be seen in DLB patients[21]. Furthermore, in a previous study,  
24  
25 we reported a high frequency of periodic limb movements in DLB patients[22]. The results of  
26  
27 the present study indicating that DLB patients exhibit dysrhythmic breathing compared to  
28  
29 normal subjects suggest that irregular breathing patterns may be a new clinical feature of  
30  
31 DLB.  
32  
33  
34  
35  
36  
37  
38  
39

40  
41 Currently, DLB and AD are diagnosed according to their respective clinical diagnostic  
42  
43 criteria[2,6], and differentiation of these two diseases is frequently difficult. Our findings of  
44  
45 different breathing patterns between DLB and AD patients suggest the usefulness of the  
46  
47 spectral analysis of breathing for discriminating patients with DLB from those with AD.  
48  
49

50  
51 Because the diagnostic threshold had a high sensitivity in our study, the spectral analysis of  
52  
53 breathing may be useful for making an exclusive diagnosis. While the utilization of SPECT  
54  
55  
56  
57  
58  
59  
60



1  
2  
3  
4  
5  
6 and MIBG myocardial scintigraphy are limited to well-equipped hospitals, the spectral  
7  
8  
9 analysis of breathing can be performed more easily and with lower expenses. As a  
10  
11  
12 screening tool for the diagnosis of DLB, the spectral analysis of breathing patterns may be  
13  
14  
15 cost-effective and useful.

16  
17 The FFT is an important tool for digital signal processing of the information commonly  
18  
19  
20 encoded in the sinusoids that form the signal. Additionally, the important information to be  
21  
22  
23 evaluated is the frequency and amplitude of the component sinusoids. To reduce spectral  
24  
25  
26 noise, a Hamming window is used that involves the multiplication of the signal by a smooth  
27  
28  
29 curve. The result is plotted graphically in terms of amplitude and frequency. In addition, we  
30  
31  
32 used Shannon Entropy in this study to quantify the variability of the amplitude spectrum,  
33  
34  
35 namely breathing irregularities. This measure has been widely used in a range of biological  
36  
37  
38 applications where quantitative descriptions of data regularity are required[23,24]. The  
39  
40  
41 Shannon Entropy indicates the degree of uncertainty and is higher when the variability of the  
42  
43  
44 parameter is greater.

45  
46 There are several limitations to the present study. First, we included patients with  
47  
48  
49 possible DLB and probable DLB in the same DLB group. Additionally, we did not make a  
50  
51  
52 pathological diagnosis of DLB or AD. A prospective investigation on the course of breathing  
53  
54  
55 patterns and cognitive impairment, including the eventual pathological diagnosis, should be  
56  
57  
58  
59  
60

1  
2  
3  
4  
5  
6 examined in a future study. Second, no arterial blood gas analyses were performed.  
7

8  
9 Therefore, a possible effect of hypercapnia or hypocapnia on breathing cannot be excluded.  
10

11  
12 To evaluate more precisely, arterial blood gas analyses should be examined in a future study,  
13

14  
15 as well. Third, we could not make the raters of respiratory measures completely blinded  
16

17  
18 to the clinical symptoms of the patients, although the final diagnosis of dementia had  
19

20  
21 been made independently, and the analysis of respiratory measures had been performed  
22

23  
24 objectively according to the pre-determined protocol. Finally, the number of patients in  
25

26  
27 each group was relatively small. We could not rule out the contribution of other comorbid  
28

29  
30 factors to irregular breathing. However, our data provide the first evidence of irregular  
31

32  
33 breathing in DLB patients. In a future study, an additional investigation involving a larger  
34

35  
36 number of subjects should be performed.  
37

38  
39 In conclusion, we found that DLB patients exhibit dysrhythmic breathing compared to  
40

41  
42 that observed in AD patients and patients without dementia. Ataxic breathing may be a new  
43

44  
45 clinical feature of DLB, and the spectral analysis of breathing patterns may be clinically  
46

47  
48 useful for the diagnostic differentiation of DLB from AD.  
49

50  
51  
52 **Acknowledgments:** This work was supported by grants-in-aid for young scientists and  
53

54  
55 scientific research from the Ministry of Education, Science, Sports and Culture of Japan, and  
56

1  
2  
3  
4  
5  
6 Research Grants from the Mitsui Sumitomo Insurance Welfare Foundation. These funding  
7  
8  
9 sources had no involvement in the study, design, analysis, interpretation or decision to  
10  
11  
12 submit this work. We thank all participants.  
13

14  
15  
16  
17  
18 **Declaration of Interest:** This was not an industry supported study. The authors have  
19  
20 indicated no financial conflicts of interest.  
21  
22

23  
24  
25  
26 **Authorship responsibility:** Shinichiro Hibi was involved in design, analysis, interpretation,  
27  
28 and drafting of article. Yasuhiro Yamaguchi was responsible for conception, design, analysis,  
29  
30 interpretation, and drafting of article. Yumi Umeda-Kameyama and Katsuya Iijima were  
31  
32 involved in design. Miwako Takahashi and Toshimitsu Momose were involved in analysis.  
33  
34  
35  
36  
37  
38 Masahiro Akishita and Yasuyoshi Ouchi were involved in design and interpretation. All  
39  
40 authors had full access to the data and take responsibility for its integrity and the accuracy of  
41  
42  
43  
44 the analysis.  
45  
46  
47  
48

49  
50 **Ethics of investigation:** The study was approved by the institutional review board of the  
51  
52 Graduate School of Medicine, University of Tokyo, and written informed consent was  
53  
54  
55  
56 obtained from all participants before the study.  
57  
58  
59  
60

## References

- [1] McKeith IG, Galasko D, Kosaka K, et al. Consensus guidelines for the clinical and pathologic diagnosis of dementia with Lewy bodies: Report of the consortium on DLB international workshop. *Neurology* 1996;47:1113-24.
- [2] McKeith IG, Dickson DW, Lowe J, et al. Diagnosis and management of dementia with Lewy bodies: Third report of the DLB consortium. *Neurology* 2005;65:1863-72.
- [3] Lobotesis K, Fenwick JD, Phipps A, et al. Occipital hypoperfusion on SPECT in dementia with Lewy bodies but not AD. *Neurology* 2001;56:643-9.
- [4] Yoshita M, Taki J, Yamada M. A clinical role for [(123)I]MIBG myocardial scintigraphy in the distinction between dementia of the Alzheimer's-type and dementia with Lewy bodies. *J Neurol Neurosurg Psychiatry* 2001;71:583-8.
- [5] Hanyu H, Shimizu S, Hirao K, et al. Comparative value of brain perfusion SPECT and [(123)I]MIBG myocardial scintigraphy in distinguishing between dementia with Lewy bodies and Alzheimer's disease. *Eur J Nucl Med Mol Imaging* 2006;33:248-53.

- 1  
2  
3  
4  
5  
6 [6] McKhann G, Drachman D, Folstein M, et al. Clinical diagnosis of Alzheimer's disease:  
7  
8  
9 report of the NINCDS-ADRDA Work Group under the auspices of Department of Health and  
10  
11  
12 Human Services Task Force on Alzheimer's Disease. *Neurology* 1984;34:939-44.  
13  
14  
15  
16 [7] Rice JE, Antic R, Thompson PD. Disordered respiration as a levodopa-induced  
17  
18  
19 dyskinesia in Parkinson's disease. *Mov Disord* 2002;17:524-27.  
20  
21  
22  
23 [8] Ferguson LM, Drummond GB. Acute effects of fentanyl on breathing pattern in  
24  
25  
26 anaesthetized subjects. *Br J Anaesth* 2006;96:384-90.  
27  
28  
29  
30 [9] Iber C, Ancoli-Israel S, Chesson A, et al. for the American Academy of Sleep Medicine.  
31  
32  
33 The AASM manual for the scoring of sleep and associated events; rules, terminology and  
34  
35  
36 technical specifications. 1st ed. Westchester, IL: American Academy of Sleep Medicine,  
37  
38  
39 2007.  
40  
41  
42  
43 [10] Stearns SD, Hush DR. Digital signal analysis. 2nd ed. Englewood Cliffs, NJ: Prentice  
44  
45  
46 Hall International Editions. 1990:155-62.  
47  
48  
49  
50 [11] Ahn SH, Kim JH, Kim DU, et al. Interaction between Sleep-Disordered Breathing and  
51  
52  
53 Acute Ischemic Stroke. *J Clin Neurol* 2013;9(1):9-13.  
54  
55  
56  
57  
58  
59  
60

1  
2  
3  
4  
5  
6 [12] Mulkey DK, Stornetta RL, Weston MC, et al. Respiratory control by ventral surface  
7  
8 chemoreceptor neurons in rats. *Nat Neurosci* 2004;7:1360-9.  
9

10  
11  
12 [13] Onimaru H, Homma I. A novel functional neuron group for respiratory rhythm generation  
13  
14 in the ventral medulla. *J Neurosci* 2003;23:1478-86.  
15  
16

17  
18  
19 [14] Smith JC, Ellenberger HH, Ballanyi K, et al. Pre-Bötzinger complex: a brainstem region  
20  
21 that may generate respiratory rhythm in mammals. *Science* 1991;254:726-9.  
22  
23  
24

25  
26 [15] Harding AJ, Broe GA, Halliday GM. Visual hallucinations in Lewy body disease relate to  
27  
28 Lewy bodies in the temporal lobe. *Brain* 2002;125:391-403.  
29  
30

31  
32 [16] Mizukami K, Homma T, Aonuma K, et al. Decreased ventilatory response to  
33  
34 hypercapnia in dementia with Lewy bodies. *Ann Neurol* 2009;65:614-7.  
35  
36  
37

38  
39 [17] Schwarzacher SW, Rüb U, Deller T. Neuroanatomical characteristics of the human  
40  
41 pre-Bötzinger complex and its involvement in neurodegenerative brainstem diseases. *Brain*  
42  
43 2011;134:24-35.  
44  
45  
46

47  
48 [18] Glass GA, Josephs KA, Ahlskog JE. Respiratory insufficiency as the primary presenting  
49  
50 symptom of multiple-system atrophy. *Arch Neurol* 2006;63:978-81.  
51  
52  
53  
54

- 1  
2  
3  
4  
5  
6 [19] Wuyts R, Vlemincx E, Bogaerts K, et al. Sigh rate and respiratory variability during  
7  
8  
9 normal breathing and the role of negative affectivity. *Int J Psychophysiol* 2011;82:175-9.  
10  
11  
12  
13 [20] Yamauchi M, Tamaki S, Yoshikawa M, et al. Differences in breathing patterning during  
14  
15  
16 wakefulness in patients with mixed apnea-dominant vs obstructive-dominant sleep apnea.  
17  
18  
19 *Chest* 2011;140:54-61.  
20  
21  
22  
23 [21] Pao WC, Boeve BF, Ferman TJ, et al. Polysomnographic findings in dementia with  
24  
25  
26 Lewy bodies. *Neurologist* 2013;19(1):1-6.  
27  
28  
29  
30 [22] Hibi S, Yamaguchi Y, Umeda-Kameyama Y, et al. The high frequency of periodic limb  
31  
32  
33 movements in patients with Lewy body dementia. *J Psychiatr Res* 2012;46:1590-4.  
34  
35  
36  
37 [23] Webber CL Jr, Zbilut JP. Dynamical assessment of physiological systems and states  
38  
39  
40 using recurrence plot strategies. *J Appl Physiol* 1994;76:965-73.  
41  
42  
43  
44 [24] Larsen PD, Trent EL, Galletly DC. Cardioventilatory coupling: effects of IPPV. *Br J*  
45  
46  
47 *Anaesth* 1999;82:546-50.  
48  
49  
50  
51  
52  
53  
54  
55  
56  
57  
58  
59  
60

## Figure legends

Figure 1 – Typical flow patterns of a DLB patient (A), an AD patient (B) and a patient without dementia (C) observed in epochs of five minutes. Respiratory pattern is more irregular in the DLB patient as compared with the AD patient and the patient without dementia. AD = Alzheimer's disease; DLB = Dementia with Lewy bodies.

Figure 2 – The typical power spectrum of a DLB patient (A), an AD patient (B) and a patient without dementia (C) obtained by Fast Fourier Transform. The amplitude spectrum of the DLB patient is distributed over the whole displayed frequency. AD = Alzheimer's disease; DLB = Dementia with Lewy bodies; A(f) = amplitude spectrum.

Figure 3 – (A) Coefficient of variation for breath-to-breath respiratory time in DLB patients, AD patients and patients without dementia. One way analysis of variance with Games-Howell post-hoc tests; significant differences in DLB vs AD ( $p = 0.003$ ) and DLB vs Without Dementia ( $p = 0.008$ ). (B) The comparison of Shannon Entropy S in DLB patients, AD patients and subjects without dementia. One way analysis of variance with Games-Howell post-hoc tests; significant differences in DLB vs AD ( $p = 0.005$ ) and DLB vs Without Dementia ( $p = 0.016$ ). Values are mean  $\pm$  standard deviation. AD = Alzheimer's



1  
2  
3  
4  
5  
6 disease; DLB = Dementia with Lewy bodies; n.s. = not significant; CV = coefficient of  
7  
8 variation.  
9

10  
11  
12 Figure 4 – Scatterplot showing the relationship between the coefficient of variation for  
13  
14 breath-to-breath respiratory time and the value of Shannon Entropy S. A significant  
15  
16 correlation ( $r = 0.78$ ,  $p < 0.001$ ) was found between the CV and the Shannon Entropy S. CV  
17  
18 = coefficient of variation.  
19  
20  
21  
22  
23  
24  
25  
26  
27  
28  
29  
30  
31  
32  
33  
34  
35  
36  
37  
38  
39  
40  
41  
42  
43  
44  
45  
46  
47  
48  
49  
50  
51  
52  
53  
54  
55  
56  
57  
58  
59  
60

Peer review only

1  
2  
3  
4  
5  
6  
7  
8  
9  
10  
11  
12  
13  
14  
15  
16  
17  
18  
19  
20  
21  
22  
23  
24  
25  
26  
27  
28  
29  
30  
31  
32  
33  
34  
35  
36  
37  
38  
39  
40  
41  
42  
43  
44  
45  
46  
47  
48  
49  
50  
51  
52  
53  
54  
55  
56  
57  
58  
59  
60

(A)

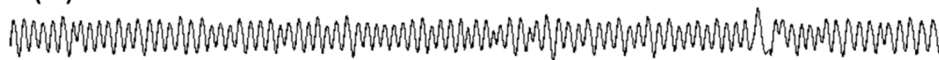

(B)

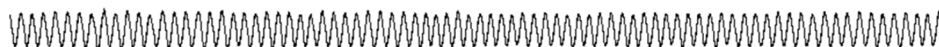

(C)

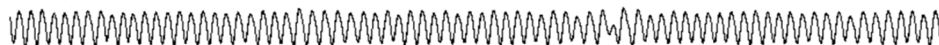

.....

.....

review only

1  
2  
3  
4  
5  
6  
7  
8  
9  
10  
11  
12  
13  
14  
15  
16  
17  
18  
19  
20  
21  
22  
23  
24  
25  
26  
27  
28  
29  
30  
31  
32  
33  
34  
35  
36  
37  
38  
39  
40  
41  
42  
43  
44  
45  
46  
47  
48  
49  
50  
51  
52  
53  
54  
55  
56  
57  
58  
59  
60

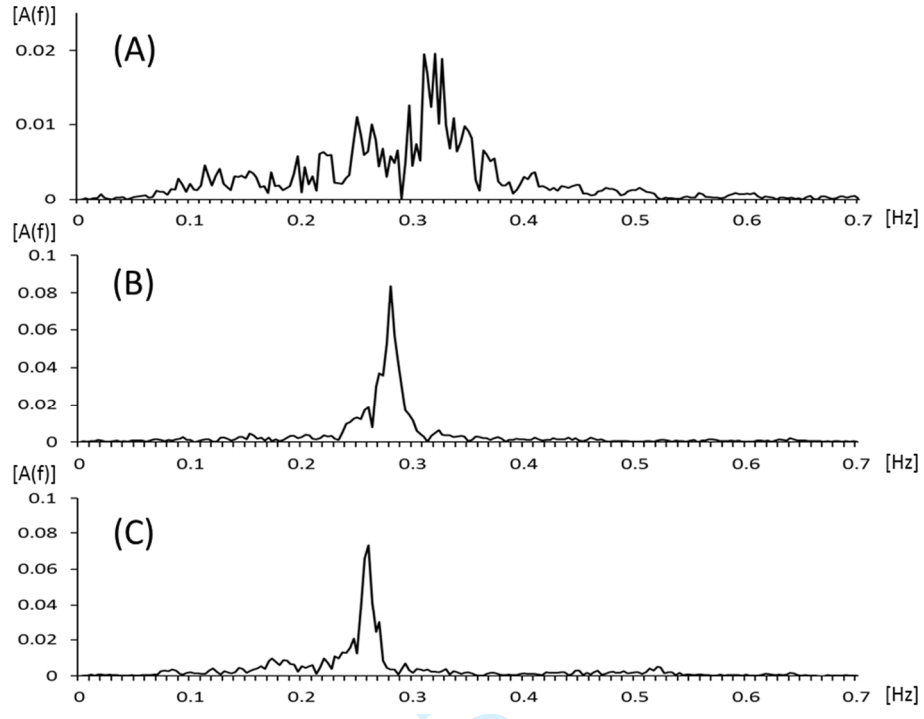

Review only

1  
2  
3  
4  
5  
6  
7  
8  
9  
10  
11  
12  
13  
14  
15  
16  
17  
18  
19  
20  
21  
22  
23  
24  
25  
26  
27  
28  
29  
30  
31  
32  
33  
34  
35  
36  
37  
38  
39  
40  
41  
42  
43  
44  
45  
46  
47  
48  
49  
50  
51  
52  
53  
54  
55  
56  
57  
58  
59  
60

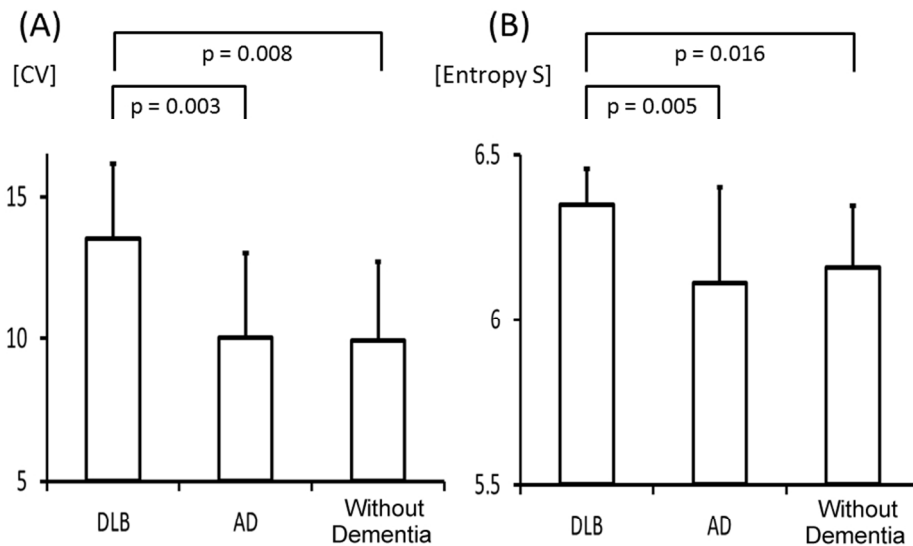

Review only

1  
2  
3  
4  
5  
6  
7  
8  
9  
10  
11  
12  
13  
14  
15  
16  
17  
18  
19  
20  
21  
22  
23  
24  
25  
26  
27  
28  
29  
30  
31  
32  
33  
34  
35  
36  
37  
38  
39  
40  
41  
42  
43  
44  
45  
46  
47  
48  
49  
50  
51  
52  
53  
54  
55  
56  
57  
58  
59  
60

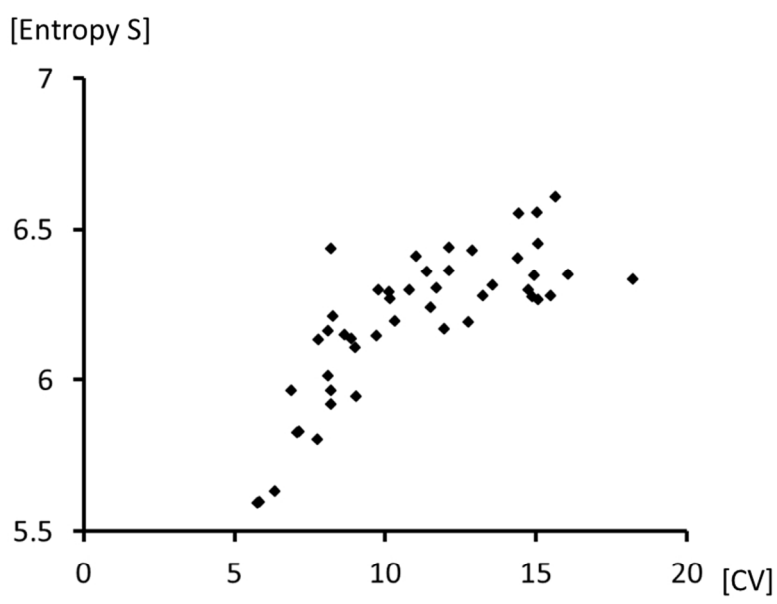

review only

STROBE Statement—Checklist of items that should be included in reports of *cross-sectional studies*

|                              | Item No | Recommendation                                                                                                                                                                                                                                                                                                                                                                                                |
|------------------------------|---------|---------------------------------------------------------------------------------------------------------------------------------------------------------------------------------------------------------------------------------------------------------------------------------------------------------------------------------------------------------------------------------------------------------------|
| <b>Title and abstract</b>    | 1       | (a) Indicate the study's design with a commonly used term in the title or the abstract<br>(b) Provide in the abstract an informative and balanced summary of what was done and what was found                                                                                                                                                                                                                 |
| <b>Introduction</b>          |         |                                                                                                                                                                                                                                                                                                                                                                                                               |
| Background/rationale         | 2       | Explain the scientific background and rationale for the investigation being reported                                                                                                                                                                                                                                                                                                                          |
| Objectives                   | 3       | State specific objectives, including any prespecified hypotheses                                                                                                                                                                                                                                                                                                                                              |
| <b>Methods</b>               |         |                                                                                                                                                                                                                                                                                                                                                                                                               |
| Study design                 | 4       | Present key elements of study design early in the paper                                                                                                                                                                                                                                                                                                                                                       |
| Setting                      | 5       | Describe the setting, locations, and relevant dates, including periods of recruitment, exposure, follow-up, and data collection                                                                                                                                                                                                                                                                               |
| Participants                 | 6       | (a) Give the eligibility criteria, and the sources and methods of selection of participants                                                                                                                                                                                                                                                                                                                   |
| Variables                    | 7       | Clearly define all outcomes, exposures, predictors, potential confounders, and effect modifiers. Give diagnostic criteria, if applicable                                                                                                                                                                                                                                                                      |
| Data sources/<br>measurement | 8*      | For each variable of interest, give sources of data and details of methods of assessment (measurement). Describe comparability of assessment methods if there is more than one group                                                                                                                                                                                                                          |
| Bias                         | 9       | Describe any efforts to address potential sources of bias                                                                                                                                                                                                                                                                                                                                                     |
| Study size                   | 10      | Explain how the study size was arrived at                                                                                                                                                                                                                                                                                                                                                                     |
| Quantitative variables       | 11      | Explain how quantitative variables were handled in the analyses. If applicable, describe which groupings were chosen and why                                                                                                                                                                                                                                                                                  |
| Statistical methods          | 12      | (a) Describe all statistical methods, including those used to control for confounding<br>(b) Describe any methods used to examine subgroups and interactions<br>(c) Explain how missing data were addressed<br>(d) If applicable, describe analytical methods taking account of sampling strategy<br>(e) Describe any sensitivity analyses                                                                    |
| <b>Results</b>               |         |                                                                                                                                                                                                                                                                                                                                                                                                               |
| Participants                 | 13*     | (a) Report numbers of individuals at each stage of study—eg numbers potentially eligible, examined for eligibility, confirmed eligible, included in the study, completing follow-up, and analysed<br>(b) Give reasons for non-participation at each stage<br>(c) Consider use of a flow diagram                                                                                                               |
| Descriptive data             | 14*     | (a) Give characteristics of study participants (eg demographic, clinical, social) and information on exposures and potential confounders<br>(b) Indicate number of participants with missing data for each variable of interest                                                                                                                                                                               |
| Outcome data                 | 15*     | Report numbers of outcome events or summary measures                                                                                                                                                                                                                                                                                                                                                          |
| Main results                 | 16      | (a) Give unadjusted estimates and, if applicable, confounder-adjusted estimates and their precision (eg, 95% confidence interval). Make clear which confounders were adjusted for and why they were included<br>(b) Report category boundaries when continuous variables were categorized<br>(c) If relevant, consider translating estimates of relative risk into absolute risk for a meaningful time period |
| Other analyses               | 17      | Report other analyses done—eg analyses of subgroups and interactions, and sensitivity analyses                                                                                                                                                                                                                                                                                                                |

|                          |    |                                                                                                                                                                            |
|--------------------------|----|----------------------------------------------------------------------------------------------------------------------------------------------------------------------------|
| <b>Discussion</b>        |    |                                                                                                                                                                            |
| Key results              | 18 | Summarise key results with reference to study objectives                                                                                                                   |
| Limitations              | 19 | Discuss limitations of the study, taking into account sources of potential bias or imprecision. Discuss both direction and magnitude of any potential bias                 |
| Interpretation           | 20 | Give a cautious overall interpretation of results considering objectives, limitations, multiplicity of analyses, results from similar studies, and other relevant evidence |
| Generalisability         | 21 | Discuss the generalisability (external validity) of the study results                                                                                                      |
| <b>Other information</b> |    |                                                                                                                                                                            |
| Funding                  | 22 | Give the source of funding and the role of the funders for the present study and, if applicable, for the original study on which the present article is based              |

\*Give information separately for exposed and unexposed groups.

**Note:** An Explanation and Elaboration article discusses each checklist item and gives methodological background and published examples of transparent reporting. The STROBE checklist is best used in conjunction with this article (freely available on the Web sites of PLoS Medicine at <http://www.plosmedicine.org/>, Annals of Internal Medicine at <http://www.annals.org/>, and Epidemiology at <http://www.epidem.com/>). Information on the STROBE Initiative is available at [www.strobe-statement.org](http://www.strobe-statement.org).

1  
2  
3  
4  
5  
6  
7  
8  
9 **Respiratory dysrhythmia in Dementia with Lewy bodies: a cross-sectional study**

10  
11  
12  
13  
14 Shinichiro Hibi<sup>1</sup>, Yasuhiro Yamaguchi<sup>1\*</sup>, Yumi Umeda-Kameyama<sup>1</sup>, Katsuya Iijima<sup>1</sup>, Miwako

15  
16 Takahashi<sup>2</sup>, Toshimitsu Momose<sup>2</sup>, Masahiro Akishita<sup>1</sup>, Yasuyoshi Ouchi<sup>1</sup>

17  
18  
19  
20  
21 <sup>1</sup>Department of Geriatric Medicine, Graduate School of Medicine, The University of Tokyo,

22  
23  
24 <sup>2</sup>Department of Radiology, Graduate School of Medicine, The University of Tokyo,

25  
26  
27  
28  
29 \*Corresponding to Yasuhiro Yamaguchi

30  
31  
32 Department of Geriatric Medicine, Graduate School of Medicine, The University of Tokyo,

33  
34 7-3-1 Hongo, Bunkyo-ku, Tokyo, 113-0033, Japan

35  
36  
37 TEL 81-3-5800-8652

38  
39  
40 FAX 81-3-5800-6530

41  
42  
43  
44 Key words: ataxic breathing, dementia with Lewy bodies, Alzheimer's disease,

45  
46  
47 polysomnographic recordings, Fast Fourier Transform

48  
49  
50  
51  
52 | Word count: ~~2841~~599 words



1  
2  
3  
4  
5  
6  
7  
8  
9 Article Focus

10  
11 In this study, we first indicated the presence of dysrhythmic breathing in the patients with  
12  
13 Dementia with Lewy bodies, compared to the patients with Alzheimer's disease and the  
14  
15 patients without dementia.  
16  
17

18  
19  
20  
21  
22 Key messages

23  
24 The dysrhythmia of the breath-to-breath time on bed rest with closed eyes is significantly  
25  
26 higher in the patients with Dementia with Lewy bodies.  
27  
28

29  
30  
31  
32 The recording of the breath-to-breath time on bed rest with closed eyes can be a useful  
33  
34 marker for the diagnosis of Dementia with Lewy bodies.  
35  
36

37  
38  
39 Strengths and Limitations

40  
41  
42 Dysrhythmic breathing is a completely novel topic in Dementia with Lewy bodies.  
43  
44

45  
46  
47 This study is a cross-sectional, small-sized pilot study.  
48  
49

50  
51  
52 The pathological diagnosis of Dementia with Lewy bodies could not be obtained.  
53  
54

**ABSTRACT**

**Objectives:** Dementia with Lewy bodies (DLB) is the second most common form of neurodegenerative dementia after Alzheimer's disease (AD). DLB is characterized by intracytoplasmic inclusions called Lewy bodies that are often seen in the brainstem. Because modulation of the respiratory rhythm is one of the most important functions of the brainstem, DLB patients may exhibit dysrhythmic breathing. This hypothesis has not yet been systematically studied. Therefore, we evaluated the association between DLB and dysrhythmic breathing.

**Design:** This was a cross-sectional study where consecutive inpatients who were admitted for the evaluation of progressive cognitive impairment were enrolled. We assessed breathing irregularity using polysomnographic recordings on bed rest with closed eyes, without reference to the clinical differentiation among DLB, AD and having no dementia.

**Setting:** Single center in Japan.

**Participants:** Fourteen DLB patients, twenty-one AD patients and twelve ~~non-demented~~ patients without dementia were enrolled in this study.

**Primary outcome measures:** The coefficient of variation (CV) of the breath-to-breath time was calculated. We also examined the amplitude spectrum A(f) obtained using the Fast Fourier Transform and Shannon Entropy S of A(f) in DLB patients compared to AD patients

1  
2  
3  
4  
5  
6  
7  
8  
9 and ~~non-demented~~ patients without dementia.

10  
11 **Results:** The values of CV and Entropy S were significantly higher in the DLB patients than  
12  
13 in the AD patients and ~~non-demented~~ patients without dementia. No significant differences  
14  
15 were found between the AD patients and the ~~non-demented~~ patients without dementia.  
16  
17

18  
19 **Conclusions:** DLB patients exhibit dysrhythmic breathing compared to AD patients and\_  
20  
21 ~~non-demented~~ patients without dementia. Dysrhythmic breathing is a new clinical feature of  
22  
23 DLB and the spectral analysis of breathing patterns can be clinically useful for the diagnostic  
24  
25 differentiation of DLB from AD.  
26  
27  
28  
29  
30  
31  
32  
33  
34  
35  
36  
37  
38  
39  
40  
41  
42  
43  
44  
45  
46  
47  
48  
49  
50  
51  
52  
53  
54  
55  
56  
57  
58  
59  
60

## 1. INTRODUCTION

Dementia with Lewy bodies (DLB) is a neurodegenerative disease characterized by parkinsonism, visual hallucinations and cognitive fluctuations. DLB is now thought to be the second most common form of dementia after Alzheimer's disease (AD), affecting 15-25% of elderly demented patients[1]. The clinical diagnostic criteria for DLB were first published in 1996 and modified in 2005[1,2]. The central feature of DLB is progressive cognitive decline. The core features include recurrent visual hallucinations, spontaneous features of parkinsonism and fluctuating cognition with pronounced variations in attention and alertness. These diagnostic criteria require clinical evaluation by a trained neurologist and include few objective markers. Although Single Photon Emission Computed Tomography (SPECT) and <sup>123</sup>I-metaiodobenzylguanidine (MIBG) myocardial scintigraphy are useful for making the differential diagnosis of DLB[3-5], these examinations are too expensive to be generally utilized. DLB is characterized by intracytoplasmic inclusions called Lewy bodies that consist of filamentous protein granules composed of alpha-synuclein and ubiquitin. Lewy bodies are often seen in the brainstem and in limbic and cortical neurons[2]. On the other hand, the brainstem serves as the connection among the cerebral hemispheres and the cerebellum, and is responsible for basic vital functions. Modulation of the respiratory rhythm is one of the most important functions of the brainstem. In cases of brain disorders, such as Wallenberg

1  
2  
3  
4  
5  
6  
7  
8  
9 syndrome and brain tumors, it is known that respiratory patterns sometimes become ataxic.

10 Because brainstem neurodegeneration is often seen in patients with DLB, the respiratory

11  
12 patterns of DLB patients might be dysrhythmic. However, this hypothesis has not yet been

13  
14 systematically studied and no controlled data have been published to date. The present

15  
16 investigation was performed in patients with DLB, patients with AD and ~~non-demented-~~

17  
18 patients without dementia to assess and compare breathing patterns. In addition, we

19  
20  
21  
22  
23  
24 evaluated the usefulness of the measurement of breathing patterns as a novel tool to aid the

25  
26  
27 differential diagnosis of dementia.

## 28 29 30 31 32 **2. METHODS**

### 33 34 35 **2.1. Subjects**

36  
37 The study population comprised consecutive inpatients of the Department of Geriatric

38  
39 Medicine at the University of Tokyo Hospital, who were admitted for the evaluation of

40  
41 progressive cognitive impairment. The patients underwent neuropsychological assessments,

42  
43 including the Mini-Mental State Examination (MMSE), blood tests, and neuroimaging tests

44  
45 (Magnetic Resonance Imaging (MRI) and SPECT). The diagnosis was made at a

46  
47  
48 consensus conference of physicians and neurologists. The diagnosis of DLB was based on

49  
50  
51 the clinical diagnostic criteria proposed by McKeith et al in 2005[2]. And AD was diagnosed

1  
2  
3  
4  
5  
6  
7  
8  
9 in accordance with the National Institute of Neurological and Communicative Disorders and  
10 Stroke and the Alzheimer's disease and Related Disorders Association (NINCDS-ADRDA)  
11  
12  
13  
14 [6]. The ~~non-demented~~ group without dementia comprised the patients who did not fit the  
15  
16  
17 criteria for dementia in the medical and neurological examinations. Between November  
18  
19 2010 and June 2012, 70 patients were enrolled in this study.

20  
21 The study was approved by the institutional review board of the Graduate School of  
22  
23  
24 Medicine, University of Tokyo, and written informed consent was obtained from all  
25  
26  
27 participants before the study.

## 28 29 30 **2.2. Exclusion Criteria**

31  
32 We evaluated the breathing patterns of DLB patients, AD patients and ~~non-demented~~  
33  
34 patients without dementia. Patients with cognitive impairments other than AD or DLB (e.g.  
35  
36  
37 normal pressure hydrocephalus, vascular dementia) were excluded.

38  
39 Breathing irregularities are associated with certain environments such as high altitudes,  
40  
41  
42 medical conditions such as heart failure and chronic obstructive pulmonary disease, and the  
43  
44  
45 usage of opioids or levodopa[7,8]. We excluded one patient who reported breathing  
46  
47  
48 problems, including dyspnea. We also excluded four patients who were taking levodopa and  
49  
50  
51 dopamine-agonists. No patients were using opioids. We excluded three patients whose  
52  
53  
54 recorded respiratory signal data were insufficient due to noise.

### 2.3. Recordings of respiration

The patients underwent thirty minutes or more of recordings of respiration on bed rest with closed eyes in the inpatient ward by using the device for polysomnography (Somnotrac Pro, CareFusion, San Diego, CA, USA). The recordings included two electroencephalogram (EEG) leads (C3-A2 and O2-A1), electrooculogram and submental electromyogram (EMG). Oronasal thermistor channel and arterial oxygen saturation (finger oximetry) were also monitored. All recordings were scored visually by an experienced rater according to the standard criteria[9].

Five consecutive minutes of stable respiratory signals measured while the patients were awake were extracted from the recordings. Stable respiratory signals during wakefulness were identified using the respiratory signals themselves, arterial oxygen saturation, EMG and EEG. Wakefulness was confirmed using EEG. When the amplitude of the EMG signal that detected any body movements was high, that part of the signal was considered to have occurred during movement and was determined to be inappropriate for analysis. Epochs including apneas and hypopneas were also excluded.

### 2.4. Analysis of Respiratory Signals

Five minutes of stable respiratory signals were analyzed. The breath-to-breath time was calculated for each respiration. To assess breathing irregularities, the coefficient of variation

1  
2  
3  
4  
5  
6  
7  
8  
9 ([standard deviation/mean] × 100) for the breath-to-breath time was calculated. The  
10  
11 respiratory rate was also calculated.  
12

13  
14 Additionally, we examined the amplitude spectrum A(f) obtained using Fast Fourier  
15  
16 Transform (FFT) for analyzing oscillation patterns in the respiratory signals. A(f) represents  
17  
18 the amplitude distribution as a function of frequency. To avoid the possibility of spectral  
19  
20 leakage, the signals were windowed by multiplying them by a Hamming window (w[n]):  
21  
22

$$23 \quad w[n] = 0.54 - 0.46 \cos(2\pi n/N) \text{ for } n = 0, 1, 2, \dots, N - 1$$

24  
25  
26 Then, the amplitude spectrum of the respiratory signals was analyzed using the FFT of  
27  
28 the Hamming-windowed signal[10]. Furthermore, according to Shannon Entropy, we  
29  
30 determined the spectral entropy S based on normalized A(f) in order to assess breathing  
31  
32 irregularities:  
33  
34

$$35 \quad \text{entropy } S = - \sum A(f) \cdot \log_2(A(f))$$

36  
37  
38 To reduce the influence of artifact in the respiratory signals and FFT, we restricted the  
39  
40 frequency of analyzing Shannon Entropy. Based on the results of the breath-to-breath time  
41  
42 analysis (1.7 to 7.6 seconds, namely 0.13 to 0.59 Hz), we determined the validated  
43  
44 frequency of 0.1 Hz to 0.6 Hz.  
45  
46  
47  
48

## 49 **2.5. Statistical Analysis**

50  
51  
52 The distribution of data was examined using the Shapiro-Wilk test. If data were normally  
53  
54  
55  
56  
57  
58  
59  
60



1  
2  
3  
4  
5  
6  
7  
8  
9 distributed, one way analysis of variance with Games-Howell post-hoc tests were applied for  
10  
11 group comparisons. If the data deviated significantly from normality, the Kruskal-Wallis test  
12  
13 was used, followed by evaluation with the Mann-Whitney U test for multiple comparisons,  
14  
15 with the p values being corrected according to the Bonferroni method. In correlation analysis,  
16  
17 the Spearman rank correlation coefficient was used. The  $\chi^2$  test was used to compare  
18  
19 categorical variables, such as gender.  
20  
21  
22

23  
24 The diagnostic cutoff points for the coefficient of variation value and Shannon Entropy S  
25  
26 to discriminate between DLB and AD were estimated for each outcome by maximizing the  
27  
28 Youden index. The discrimination ability was assessed by the area under the curve (AUC).  
29  
30 Using this threshold, the sensitivity and specificity were calculated.  
31  
32  
33

34 All of the statistical analyses were performed using the SPSS software program  
35  
36 (version 19.0, SPSS inc., Chicago, IL, USA). Statistical significance was defined as P values  
37  
38 < 0.05.  
39  
40  
41  
42  
43  
44

### 45 3. RESULTS

#### 46 3.1. Patient Characteristics

47  
48  
49 Fourteen patients with DLB, twenty-one patients with AD and twelve ~~non-demented~~  
50  
51 patients without dementia were enrolled in this study. Among the fourteen patients in the  
52  
53  
54  
55

1  
2  
3  
4  
5  
6  
7  
8  
9 DLB group, nine patients had probable DLB and five patients had possible DLB. The  
10  
11 diagnoses in the five possible DLB patients were all supported by the typical findings in  
12  
13 SPECT: generalized low uptake, reduced occipital activity, and relatively preserved  
14  
15 hippocampal blood flow. Table 1 shows the characteristics of the subjects. The age and sex  
16  
17 distributions were not significantly different among the three groups. No significant  
18  
19 difference was found between the DLB group and the AD group in the MMSE. The use of  
20  
21 medications for hypertension, hyperlipidemia and diabetes mellitus were similar between  
22  
23 the groups. Four patients in the DLB group, five patients in the AD group and no patients in  
24  
25  
26  
27  
28  
29 the ~~non-demented~~ group without dementia had taken donepezil.  
30  
31  
32  
33  
34  
35  
36  
37  
38  
39  
40  
41  
42  
43  
44  
45  
46  
47  
48  
49  
50  
51  
52  
53  
54  
55  
56  
57  
58  
59  
60

Table 1 - Characteristics of DLB patients, AD patients and ~~non-demented~~ patients without dementia.

| Characteristics    | DLB patients | AD patients | <u>Without Dementia</u><br><del>Non-demented</del> | p Value  |
|--------------------|--------------|-------------|----------------------------------------------------|----------|
| Number of subjects | n = 14       | n = 21      | n = 12                                             |          |
| Age (years)        | 81.5 (5.6)   | 79.6 (7.8)  | 78.5 (4.3)                                         | n.s.     |
| Sex (men / women)  | 6 / 8        | 7 / 14      | 4 / 8                                              | n.s.     |
| MMSE               | 21.0 (3.8)   | 21.2 (3.4)  | 27.8 (2.1)                                         | < 0.001* |
| Hypertension       | 4            | 9           | 3                                                  | n.s.     |
| Hyperlipidemia     | 2            | 1           | 0                                                  | n.s.     |
| Diabetes mellitus  | 1            | 1           | 1                                                  | n.s.     |

Values expressed as mean (standard deviation) or number. \* = one way analysis of variance

with Games-Howell post-hoc tests (DLB vs AD : n.s., DLB vs ~~Non-demented~~ Without

Dementia: p < 0.001, AD vs Without Dementia~~Non-demented~~: p < 0.001); AD = Alzheimer's

disease; DLB = Dementia with Lewy bodies; MMSE = Mini-mental State Examination; n.s. =

not significant.

### 3.2. Breathing Patterns

Figure 1 shows examples of flow signals during wakefulness for a DLB patient, an AD patient and a ~~non-demented~~ patient without dementia. Figure 2 shows examples of the characteristic patterns of the amplitude spectrum  $A(f)$ . The AD patient and the ~~non-demented~~ patients without dementia exhibited a sharp peak in the spectrum. On the other hand, the amplitude spectrum of the DLB patient was distributed over the whole displayed frequency area. These tracings indicate the occurrence of more irregular breathing patterns in the DLB patient compared with that observed in the AD patient and the ~~non-demented~~ patient without dementia.

The respiratory rates calculated from the average breath-to-breath time in the DLB patients, the AD patients and the ~~non-demented~~ patients without dementia were 16.2 (3.2), 17.7 (2.7) and 18.0 (2.3) per min, respectively (mean (standard deviation)). These differences were not statistically significant. On the other hand, the coefficient of variation (CV) value for the breath-to-breath time in the DLB patients was significantly higher than that in either the AD patients or the ~~non-demented~~ patients without dementia (13.5 (2.6), 10.0

1  
2  
3  
4  
5  
6  
7  
8  
9 (3.0) and 9.9 (2.8), respectively) (Figure 3A). To discriminate the DLB patients from the AD  
10 patients using the CV value, the most favorable diagnostic threshold was found to be 10.2  
11  
12  
13  
14 (AUC = 0.79). This threshold had a sensitivity of 92.9% and a specificity of 61.9%.

15  
16 The results of the comparison of Shannon Entropy S are summarized in Figure 3B. The  
17 values of Shannon Entropy S were significantly higher in the DLB patients than in the AD  
18 patients and the ~~non-demented~~ patients without dementia (6.35 (0.11), 6.11 (0.29) and 6.16  
19  
20  
21  
22  
23  
24 (0.19), respectively). To discriminate the DLB patients from the AD patients using the  
25  
26 Shannon Entropy S value, the most favorable diagnostic threshold was found to be 6.18  
27  
28  
29 (AUC = 0.77). This threshold had a sensitivity of 100% and a specificity of 57.1%.

30  
31  
32 These findings indicate the diversity of breathing frequencies, that is, respiratory  
33  
34  
35  
36 dysrhythmia, in DLB patients.

### 37 3.3. Comparison of CV and Shannon Entropy S

38  
39 In order to assess breathing irregularities, we used two different methods, namely, we  
40  
41  
42 compare CV and Shannon Entropy S. These two methods are independent approaches to  
43  
44  
45 the assessment of breathing patterns; however, a significant correlation (Spearman  $r = 0.78$ ,  
46  
47  
48  $p < 0.001$ ) was observed between these two values (Figure 4).

## 49 4. DISCUSSION

1  
2  
3  
4  
5  
6  
7  
8  
9 In this study, we observed that patients with DLB exhibit dysrhythmic breathing  
10 compared to patients with AD and ~~non-demented~~ patients without dementia.

11  
12  
13  
14 The modulation of the respiratory rhythm is closely associated with the brainstem<sup>[11]</sup>. In  
15 particular, the pre-Bötzinger complex (pre-BötC) and the retro-trapezoid nucleus/parafacial  
16 respiratory group (RTN/pFRG) are thought to be very important for respiratory rhythm  
17 regulation<sup>[124-143]</sup>. For this reason, respiratory dysrhythmia may occur in cases of  
18 brainstem disorders, such as Wallenberg syndrome and brain tumors. In DLB patients, Lewy  
19 bodies are often seen in the brainstem; however, it remains unknown whether the  
20 localization and density of Lewy bodies are strongly associated with the symptoms of DLB. It  
21 is possible, considering the neurodegenerative aspects of DLB, that localization of Lewy  
22 bodies in the brainstem causes respiratory dysrhythmia. One report has indicated that visual  
23 hallucinations are associated with increased numbers of Lewy bodies in the temporal lobe  
24 and amygdala, each of these areas being implicated in the generation of complex visual  
25 images<sup>[154]</sup>. In addition, concerning the association between respiration and DLB,  
26 Mizukami et al. reported the occurrence of decreased ventilatory responses to hypercapnia  
27 in DLB patients<sup>[165]</sup>. Furthermore, respiratory insufficiency, sleep-disordered breathing and  
28 central respiratory failure are known to occur in patients with multiple system  
29 atrophy<sup>[176,187]</sup>, which is an alpha-synucleinopathies, similar to DLB.  
30  
31  
32  
33  
34  
35  
36  
37  
38  
39  
40  
41  
42  
43  
44  
45  
46  
47  
48  
49  
50  
51  
52  
53  
54  
55  
56  
57  
58  
59  
60

1  
2  
3  
4  
5  
6  
7  
8  
9 In this study, we also analyzed the breathing patterns of ~~non-demented~~ patients without  
10 dementia. The coefficient of variation for breath-to-breath time in the ~~non-demented~~ patients  
11 without dementia was not significantly different from that reported in previous studies of  
12 control subjects[198,2049]. Although the complication with hypertension was greater in  
13 AD group than in DLB group, no significant differences were found in the measures of  
14 breathing patterns between the patients with hypertension and the patients without  
15 hypertension (data not shown).

16  
17  
18  
19  
20  
21  
22  
23  
24  
25  
26  
27 DLB patients exhibit many clinical features other than dementia, visual hallucinations  
28 and parkinsonism. For example, Rapid Eye Movement sleep behavior disorder, severe  
29 autonomic dysfunctions such as orthostatic hypotension, repeated syncope and  
30 systematized delusions can be seen in DLB patients[21]. Furthermore, in a previous study,  
31 we reported a high frequency of periodic limb movements in DLB patients[229]. The results  
32 of the present study indicating that DLB patients exhibit dysrhythmic breathing compared to  
33 normal subjects suggest that irregular breathing patterns may be a new clinical feature of  
34 DLB.

35  
36  
37  
38  
39  
40  
41  
42  
43  
44  
45  
46  
47 Currently, DLB and AD are diagnosed according to their respective clinical diagnostic  
48 criteria[2,6], and differentiation of these two diseases is frequently difficult. Our findings of  
49 different breathing patterns between DLB and AD patients suggest the usefulness of the  
50  
51  
52  
53  
54  
55  
56  
57  
58  
59  
60

1  
2  
3  
4  
5  
6  
7  
8  
9 spectral analysis of breathing for discriminating patients with DLB from those with AD.

10  
11 Because the diagnostic threshold had a high sensitivity in our study, the spectral analysis of  
12  
13 breathing may be useful for making an exclusive diagnosis. While the utilization of SPECT  
14  
15 and MIBG myocardial scintigraphy are limited to well-equipped hospitals, the spectral  
16  
17 analysis of breathing can be performed more easily and with lower expenses. As a  
18  
19 screening tool for the diagnosis of DLB, the spectral analysis of breathing patterns may be  
20  
21 cost-effective and useful.  
22  
23  
24  
25

26  
27 The FFT is an important tool for digital signal processing of the information commonly  
28  
29 encoded in the sinusoids that form the signal. Additionally, the important information to be  
30  
31 evaluated is the frequency and amplitude of the component sinusoids. To reduce spectral  
32  
33 noise, a Hamming window is used that involves the multiplication of the signal by a smooth  
34  
35 curve. The result is plotted graphically in terms of amplitude and frequency. In addition, we  
36  
37 used Shannon Entropy in this study to quantify the variability of the amplitude spectrum,  
38  
39 namely breathing irregularities. This measure has been widely used in a range of biological  
40  
41 applications where quantitative descriptions of data regularity are required[234,242]. The  
42  
43  
44  
45  
46  
47 Shannon Entropy indicates the degree of uncertainty and is higher when the variability of the  
48  
49 parameter is greater.  
50

51  
52 There are several limitations to the present study. First, we included patients with  
53  
54



1  
2  
3  
4  
5  
6  
7  
8  
9 possible DLB and probable DLB in the same DLB group. Additionally, we did not make a  
10  
11 pathological diagnosis of DLB or AD. A prospective investigation on the course of breathing  
12  
13 patterns and cognitive impairment, including the eventual pathological diagnosis, should be  
14  
15 examined in a future study. Second, no arterial blood gas analyses were performed.  
16  
17  
18 Therefore, a possible effect of hypercapnia or hypocapnia on breathing cannot be excluded.  
19  
20  
21 To evaluate more precisely, arterial blood gas analyses should be examined in a future study,  
22  
23 as well. Third, we could not make the raters of respiratory measures completely blinded  
24  
25 to the clinical symptoms of the patients, although the final diagnosis of dementia had  
26  
27 been made independently, and the analysis of respiratory measures had been performed  
28  
29 objectively according to the pre-determined protocol. Finally, Third, the number of patients  
30  
31 in each group was relatively small. We could not rule out the contribution of other  
32  
33 comorbid factors to irregular breathing. However, our data provide the first evidence of  
34  
35 irregular breathing in DLB patients. In a future study, an additional investigation involving a  
36  
37 larger number of subjects should be performed.  
38  
39  
40  
41  
42  
43  
44

45 In conclusion, we found that DLB patients exhibit dysrhythmic breathing compared to  
46  
47 that observed in AD patients and ~~non-demented~~ patients without dementia. Ataxic breathing  
48  
49 may be a new clinical feature of DLB, and the spectral analysis of breathing patterns may be  
50  
51 clinically useful for the diagnostic differentiation of DLB from AD.  
52  
53  
54  
55  
56  
57  
58  
59  
60

1  
2  
3  
4  
5  
6  
7  
8  
9  
10  
11 **Acknowledgments:** This work was supported by grants-in-aid for young scientists and  
12 scientific research from the Ministry of Education, Science, Sports and Culture of Japan, and  
13 Research Grants from the Mitsui Sumitomo Insurance Welfare Foundation. These funding  
14 sources had no involvement in the study, design, analysis, interpretation or decision to  
15 submit this work. We thank all participants.  
16  
17  
18  
19  
20  
21  
22  
23  
24  
25  
26

27 **Declaration of Interest:** This was not an industry supported study. The authors have  
28 indicated no financial conflicts of interest.  
29  
30  
31  
32  
33

34 **Authorship responsibility:** Shinichiro Hibi was involved in design, analysis, interpretation,  
35 and drafting of article. Yasuhiro Yamaguchi was responsible for conception, design, analysis,  
36 interpretation, and drafting of article. Yumi Umeda-Kameyama and Katsuya Iijima were  
37 involved in design. Miwako Takahashi and Toshimitsu Momose were involved in analysis.  
38 Masahiro Akishita and Yasuyoshi Ouchi were involved in design and interpretation. All  
39 authors had full access to the data and take responsibility for its integrity and the accuracy of  
40 the analysis.  
41  
42  
43  
44  
45  
46  
47  
48  
49  
50  
51  
52  
53  
54  
55  
56  
57  
58  
59  
60

1  
2  
3  
4  
5  
6  
7  
8  
9  
10  
11  
12  
13  
14  
15  
16  
17  
18  
19  
20  
21  
22  
23  
24  
25  
26  
27  
28  
29  
30  
31  
32  
33  
34  
35  
36  
37  
38  
39  
40  
41  
42  
43  
44  
45  
46  
47  
48  
49  
50  
51  
52  
53  
54  
55  
56  
57  
58  
59  
60

**Ethics of investigation:** The study was approved by the institutional review board of the Graduate School of Medicine, University of Tokyo, and written informed consent was obtained from all participants before the study.

For peer review only

1  
2  
3  
4  
5  
6  
7  
8  
9 **References**

10  
11  
12 [1] McKeith IG, Galasko D, Kosaka K, et al. Consensus guidelines for the clinical and  
13 pathologic diagnosis of dementia with Lewy bodies: Report of the consortium on DLB  
14 international workshop. *Neurology* 1996;47:1113-24.  
15  
16  
17  
18

19  
20  
21 [2] McKeith IG, Dickson DW, Lowe J, et al. Diagnosis and management of dementia with  
22 Lewy bodies: Third report of the DLB consortium. *Neurology* 2005;65:1863-72.  
23  
24

25  
26  
27 [3] Lobotesis K, Fenwick JD, Phipps A, et al. Occipital hypoperfusion on SPECT in dementia  
28 with Lewy bodies but not AD. *Neurology* 2001;56:643-9.  
29  
30

31  
32  
33 [4] Yoshita M, Taki J, Yamada M. A clinical role for [(123)I]MIBG myocardial scintigraphy in  
34 the distinction between dementia of the Alzheimer's-type and dementia with Lewy bodies. *J*  
35  
36  
37  
38  
39  
40  
41  
42  
43  
44  
45  
46  
47  
48  
49  
50  
51  
52  
53  
54  
55  
56  
57  
58  
59  
60

41  
42 [5] Hanyu H, Shimizu S, Hirao K, et al. Comparative value of brain perfusion SPECT and  
43 [(123)I]MIBG myocardial scintigraphy in distinguishing between dementia with Lewy bodies  
44 and Alzheimer's disease. *Eur J Nucl Med Mol Imaging* 2006;33:248-53.  
45  
46  
47  
48  
49  
50  
51  
52  
53  
54  
55  
56  
57  
58  
59  
60

1  
2  
3  
4  
5  
6  
7  
8  
9 [6] McKhann G, Drachman D, Folstein M, et al. Clinical diagnosis of Alzheimer's disease:  
10  
11 report of the NINCDS-ADRDA Work Group under the auspices of Department of Health and  
12  
13 Human Services Task Force on Alzheimer's Disease. *Neurology* 1984;34:939-44.  
14  
15

16  
17 [7] Rice JE, Antic R, Thompson PD. Disordered respiration as a levodopa-induced  
18  
19 dyskinesia in Parkinson's disease. *Mov Disord* 2002;17:524-27.  
20  
21

22  
23 [8] Ferguson LM, Drummond GB. Acute effects of fentanyl on breathing pattern in  
24  
25 anaesthetized subjects. *Br J Anaesth* 2006;96:384-90.  
26  
27

28  
29 [9] Iber C, Ancoli-Israel S, Chesson A, et al. for the American Academy of Sleep Medicine.  
30  
31 The AASM manual for the scoring of sleep and associated events; rules, terminology and  
32  
33 technical specifications. 1st ed. Westchester, IL: American Academy of Sleep Medicine,  
34  
35 2007.  
36  
37

38  
39 [10] Stearns SD, Hush DR. Digital signal analysis. 2nd ed. Englewood Cliffs, NJ: Prentice  
40  
41 Hall International Editions. 1990:155-62.  
42  
43

44  
45  
46 [11] Ahn SH, Kim JH, Kim DU, et al. Interaction between Sleep-Disordered Breathing and  
47  
48 Acute Ischemic Stroke. *J Clin Neurol* 2013;9(1):9-13.  
49  
50  
51

Formatted: Pattern: Clear

1  
2  
3  
4  
5  
6  
7  
8  
9 [124] Mulkey DK, Stornetta RL, Weston MC, et al. Respiratory control by ventral surface  
10 chemoreceptor neurons in rats. *Nat Neurosci* 2004;7:1360-9.  
11  
12

13  
14 [132] Onimaru H, Homma I. A novel functional neuron group for respiratory rhythm  
15 generation in the ventral medulla. *J Neurosci* 2003;23:1478-86.  
16  
17  
18

19  
20 [143] Smith JC, Ellenberger HH, Ballanyi K, et al. Pre-Bötzinger complex: a brainstem  
21 region that may generate respiratory rhythm in mammals. *Science* 1991;254:726-9.  
22  
23  
24

Formatted: German (Germany)

25  
26 [154] Harding AJ, Broe GA, Halliday GM. Visual hallucinations in Lewy body disease relate  
27 to Lewy bodies in the temporal lobe. *Brain* 2002;125:391-403.  
28  
29  
30

31  
32 [165] Mizukami K, Homma T, Aonuma K, et al. Decreased ventilatory response to  
33 hypercapnia in dementia with Lewy bodies. *Ann Neurol* 2009;65:614-7.  
34  
35  
36

37  
38 [176] Schwarzacher SW, Rüb U, Deller T. Neuroanatomical characteristics of the human  
39 pre-Bötzinger complex and its involvement in neurodegenerative brainstem diseases. *Brain*  
40 2011;134:24-35.  
41  
42  
43  
44  
45

46  
47 [187] Glass GA, Josephs KA, Ahlskog JE. Respiratory insufficiency as the primary  
48 presenting symptom of multiple-system atrophy. *Arch Neurol* 2006;63:978-81.  
49  
50  
51  
52

Formatted: German (Germany)

1  
2  
3  
4  
5  
6  
7  
8  
9 [198] Wuyts R, Vlemincx E, Bogaerts K, et al. Sigh rate and respiratory variability during  
10 normal breathing and the role of negative affectivity. *Int J Psychophysiol* 2011;82:175-9.  
11  
12

13  
14 [2049] Yamauchi M, Tamaki S, Yoshikawa M, et al. Differences in breathing patterning  
15 during wakefulness in patients with mixed apnea-dominant vs obstructive-dominant sleep  
16 apnea. *Chest* 2011;140:54-61.  
17  
18  
19

20  
21 [21] Pao WC, Boeve BF, Ferman TJ, et al. Polysomnographic findings in dementia with  
22 Lewy bodies. *Neurologist* 2013;19(1):1-6.  
23  
24  
25  
26  
27

28  
29 [220] Hibi S, Yamaguchi Y, Umeda-Kameyama Y, et al. The high frequency of periodic limb  
30 movements in patients with Lewy body dementia. *J Psychiatr Res* 2012;46:1590-4.  
31  
32  
33

34  
35 [234] Webber CL Jr, Zbilut JP. Dynamical assessment of physiological systems and states  
36 using recurrence plot strategies. *J Appl Physiol* 1994;76:965-73.  
37  
38  
39

40  
41 [242] Larsen PD, Trent EL, Galletly DC. Cardioventilatory coupling: effects of IPPV. *Br J*  
42 *Anaesth* 1999;82:546-50.  
43  
44  
45  
46  
47  
48  
49  
50  
51  
52  
53  
54  
55

### Figure legends

Figure 1 – Typical flow patterns of a DLB patient (A), an AD patient (B) and a ~~non-demented~~ patient without dementia (C) observed in epochs of five minutes. Respiratory pattern is more irregular in the DLB patient as compared with the AD patient and the ~~non-demented~~ patients without dementia. AD = Alzheimer's disease; DLB = Dementia with Lewy bodies.

Figure 2 – The typical power spectrum of a DLB patient (A), an AD patient (B) and a ~~non-demented~~ patient without dementia (C) obtained by Fast Fourier Transform. The amplitude spectrum of the DLB patient is distributed over the whole displayed frequency. AD = Alzheimer's disease; DLB = Dementia with Lewy bodies; A(f) = amplitude spectrum.

Figure 3 – (A) Coefficient of variation for breath-to-breath respiratory time in DLB patients, AD patients and ~~non-demented~~ patients without dementia. One way analysis of variance with Games-Howell post-hoc tests; significant differences in DLB vs AD ( $p = 0.003$ ) and DLB vs ~~non-demented~~ Without Dementia ( $p = 0.008$ ). (B) The comparison of Shannon Entropy S in DLB patients, AD patients and ~~non-demented~~ subjects without dementia. One way analysis of variance with Games-Howell post-hoc tests; significant differences in DLB vs AD ( $p = 0.005$ ) and DLB vs ~~Without Dementia~~ non-demented ( $p = 0.016$ ). Values are mean  $\pm$



1  
2  
3  
4  
5  
6  
7  
8  
9 standard deviation. AD = Alzheimer's disease; DLB = Dementia with Lewy bodies; n.s. = not  
10  
11 significant; CV = coefficient of variation.  
12  
13

14  
15 Figure 4 – Scatterplot showing the relationship between the coefficient of variation for  
16  
17 breath-to-breath respiratory time and the value of Shannon Entropy S. A significant  
18  
19 correlation ( $r = 0.78$ ,  $p < 0.001$ ) was found between the CV and the Shannon Entropy S. CV  
20  
21 = coefficient of variation.  
22  
23  
24  
25  
26  
27  
28  
29  
30  
31  
32  
33  
34  
35  
36  
37  
38  
39  
40  
41  
42  
43  
44  
45  
46  
47  
48  
49  
50  
51  
52  
53  
54  
55  
56  
57  
58  
59  
60
